# Periplasmic protein EipA determines envelope stress resistance and virulence in *Brucella abortus*

Julien Herrou<sup>a,#</sup>, Jonathan W. Willett<sup>a,#</sup>, Aretha Fiebig<sup>a</sup>, Lydia M. Varesio<sup>a</sup>, Daniel M. Czyż<sup>b</sup>, Jason X. Cheng<sup>c</sup>, Eveline Ultee<sup>d</sup>, Ariane Briegel<sup>d</sup>, Lance Bigelow<sup>e</sup>, Gyorgy Babnigg<sup>e</sup>, Youngchang Kim<sup>e</sup>, and Sean Crosson<sup>a\*</sup>

<sup>a</sup>Department of Biochemistry and Molecular Biology, University of Chicago, Chicago, Illinois, USA

<sup>b</sup>Department of Microbiology and Cell Science, University of Florida, Gainesville, Florida, USA

<sup>c</sup>Department of Pathology, The University of Chicago, Chicago, Illinois, USA

<sup>d</sup>Department of Biology, Universiteit Leiden, Leiden, Netherlands

<sup>e</sup>Biosciences Division, Argonne National Laboratory, Argonne, Illinois, USA

\*To whom correspondence should be addressed: Sean Crosson, [scrosson@uchicago.edu](mailto:scrosson@uchicago.edu).

# Contributed equally to this work

**Running Title:** *Characterization of a DUF1134 protein in Alphaproteobacteria*

**Keywords:** Stress response, *bab1\_1612*, *bov\_1540*, *CC\_1035*, *CCNA\_01087*, DUF1134, PF06577, Alphaproteobacteria, *Brucella*, *Caulobacter*, CtrA, cell division, envelope stress, LPS, O-antigen

## Summary

Molecular components of the *Brucella abortus* cell envelope, including lipopolysaccharide, play a major role in its ability to infect, colonize and survive inside mammalian host cells. We have defined a role for a conserved gene of unknown function in *B. abortus* envelope stress resistance and infection. Expression of this gene, which we name *eipA*, is directly activated by the essential cell cycle regulator, CtrA. *eipA* encodes a soluble periplasmic protein that adopts an unusual eight-stranded  $\beta$ -barrel fold. Deletion of *eipA* attenuates replication and survival in macrophage and mouse infection models, and results in sensitivity to cell envelope stressors *in vitro*. Transposon disruption of genes required for LPS O-polysaccharide biosynthesis is synthetically lethal with *eipA* deletion. This genetic connection between O-polysaccharide and *eipA* is corroborated by our discovery that *eipA* is essential in *Brucella ovis*, a rough species that harbors mutations in several genes required for O-polysaccharide production. Conditional depletion of *eipA* expression in *B. ovis* results in a cell chaining phenotype, providing evidence that *eipA* directly or indirectly influences cell division in *Brucella*. Our data provide evidence that EipA is a molecular determinant of *Brucella* virulence that functions to maintain cell envelope integrity and influences cell division.

## Introduction

*Brucella abortus* is a causative agent of brucellosis, a worldwide zoonosis. This bacterium is highly infectious and can be easily transmitted to humans through contact with infected animals and animal products. In humans, disease is often severe and is characterized by multiple sequelae including undulating fever, arthritis, hepatomegaly, splenomegaly, and fatigue. *B. abortus* has the ability to enter and replicate inside mammalian cells (1), which enables immune evasion and can reduce efficacy of antimicrobial therapies. There are several molecular features of *B. abortus* that play a key role in its ability to infect hosts (1-8), including

smooth lipopolysaccharide (SLPS) (9-12), the type IV secretion system (6, 13-15), and secreted protein effectors (16-19). Here, we report a functional and structural analysis of envelope integrity protein **A** (EipA), a protein required for *B. abortus* envelope stress resistance and infection.

*Brucella* EipA is a 198-residue protein of unknown function that has been previously described as one of several dozen conserved “signature proteins” of the class Alphaproteobacteria (20) (Figure 1). The promoter region of *eipA* homologs in *Caulobacter crescentus* (gene loci *CC\_1035*, *CCNA\_1087*) (21, 22) and in *Sinorhizobium meliloti* (locus *Smc00651*) (23-25) contains binding motifs for the essential cell cycle regulator CtrA (TTAA-N<sub>7</sub>-TTAA), suggesting that expression of this protein is tied to the cell cycle. However, functional information on this gene family is limited: *Rhizobium leguminosarum* strains harboring transposon insertions in *eipA* (locus *RL3761*) have a reported growth defect in complex medium (26); more recently, a large-scale phenotypic analysis of multiple bacterial species (27) showed that mutations in *C. crescentus* and *Sphingomonas koreensis eipA* (locus *Ga0059261\_2034*) resulted in antimicrobial susceptibility and a general growth defect in certain defined media, respectively.

We demonstrate that CtrA does, in fact, directly bind the promoter region of *B. abortus eipA* to activate its transcription. EipA folds into a small  $\beta$ -barrel and is secreted to the periplasmic space of the *Brucella* cell. Growth and survival of a *B. abortus* strain in which *eipA* was deleted ( $\Delta eipA$ ) was attenuated in macrophage and mouse infection models. In *B. abortus* and the related alphaproteobacterium, *Caulobacter crescentus*, deletion of *eipA* results in sensitivity to compounds that perturb the integrity of the cell envelope. This result provides evidence that *eipA* executes a conserved function in this class of bacteria. *eipA* is synthetically lethal with LPS O-polysaccharide biosynthesis genes in *B. abortus* and is essential in *Brucella ovis*, which lacks O-polysaccharide (28). Depletion of *eipA* expression in *B. ovis* results in a cell division defect. These results, along with additional experimental data presented herein, provide evidence that *eipA* functions to maintain cell envelope integrity and influences cell division in *Brucella*.

## Results

### ***eipA* expression is activated by the essential cell cycle regulator, CtrA**

*B. abortus* EipA, encoded by gene locus *bab1\_1612*, is a member of sequence family DUF1134 (29) and Pfam PF06577 (30). This family is conserved in the class Alphaproteobacteria (Figure 1 and S1). As previously described (31), *eipA* is co-conserved with the essential cell cycle regulators *chpT* (*bab1\_1613*) and *ctrA* (*bab1\_1614*) (32-34).

It was previously proposed that homologs of *eipA* are directly regulated by CtrA in *C. crescentus* (21, 22) and in *S. meliloti* (23-25), but this prediction has remained untested. We sought to determine whether expression of *eipA* is CtrA regulated in *B. abortus* (35). The consensus CtrA binding motif is TTAA-N<sub>7</sub>-TTAA (36, 37), and the *eipA* promoter contains a non-consensus CtrA binding site **TAAA-(TTCGGGT)-CTAA**. We thus conducted an Electrophoretic Mobility Shift Assay (EMSA) with a <sup>32</sup>P-labeled DNA oligo corresponding to the promoter sequence of *eipA* (*P<sub>eipA</sub>*) and CtrA. A full shift of labeled DNA probe was observed in presence of CtrA (Figure 2A). To test the specificity of this interaction, we added an excess of equivalent cold (i.e. unlabeled) DNA probe to the labeled DNA probe. No shift was observed in this condition, signifying that the cold DNA probe competes for interaction with CtrA. An excess of a cold DNA probe carrying a mutated CtrA binding site failed to compete CtrA from the

specific site (Figure 2A). These results provide evidence that CtrA specifically interacts with the *eipA* promoter region.

We next tested whether CtrA influenced EipA protein expression in *B. abortus* cells. To measure EipA protein levels, we developed polyclonal antisera to EipA and confirmed the specificity of this reagent (Figure 2B). CtrA is essential in *B. abortus* (31). To evaluate the effect of CtrA on EipA expression, we expressed an inducible variant of CpdR lacking a phosphorylation site (CpdR<sup>D52A</sup>) that activates CtrA proteolysis *in vivo* and thus depletes CtrA protein in the cell (31, 38). As expected, induction of CpdR<sup>D52A</sup> expression with isopropyl  $\beta$ -D-1-thiogalactopyranoside (IPTG) reduced cellular CtrA levels (Figure 2C). This was accompanied by a marked reduction in the steady-state levels of EipA (Figure 2C). This result is consistent with a model in which CtrA activates *eipA* expression.

### ***eipA* is required for intracellular replication/survival *in vitro* and for maintenance of spleen colonization *in vivo***

To evaluate the role of EipA in infection, we infected THP-1 macrophages with wild-type *B. abortus*,  $\Delta eipA$ , and the corresponding *eipA* complementation strain. Infected macrophages were lysed and Colony Forming Units (CFU) were enumerated at 1, 24 and 48 hours post-infection. No significant differences at the 1-hour time point were observed, indicating that there was no defect in entry for any strain (Figure 3A). At 48 hours post-infection, we observed a significant reduction (~1.5 log) in the number of intracellular *B. abortus*  $\Delta eipA$ , providing evidence that *eipA* is required to replicate and/or survive in THP1 cells. This defect was fully complemented by integration of a single copy of *eipA* back into the  $\Delta eipA$  strain.

We further evaluated the role of *eipA* in a mouse infection model. Mice infected with the  $\Delta eipA$  strain exhibited no significant differences in spleen weight or bacterial load 1-week post infection compared to wild type infected mice (Figure 3B). At 4 and 8 weeks, mice infected with the wild-type or the complemented strains had pronounced splenomegaly with a load of  $\sim 5 \times 10^6$  CFU/spleen. In contrast, mice infected with  $\Delta eipA$  had smaller spleens with reduced numbers of bacteria (Figure 3B). We conclude that *eipA* is not required for spleen colonization but is required for full virulence and chronic persistence in a mouse model of infection.

To assess differences in pathology of mice infected with wild-type and  $\Delta eipA$  strains, we harvested spleens at 8 weeks post infection. Spleens were fixed, mounted, and subjected to hematoxylin and eosin (H&E) staining (Figure 4). In comparison to naïve (uninfected) mice (Figure 4A), spleens of mice infected with wild-type and complementation strains were inflamed, had a significantly reduced white to red pulp ratio due to disruption of lymphoid follicles (follicular lysis) and red pulp expansion, and had increased marginal zones (Figure 4B and D). In addition, we observed higher extramedullary hematopoiesis, histiocytic proliferation, granulomas, and the presence of *Brucella* immunoreactivities (Figure 4B and D). Mice infected with  $\Delta eipA$  had reduced pathologic features with no change in white to red pulp ratio, no follicular lysis or red pulp expansion, and a minimal increase in marginal zones (Figure 4C). Extramedullary hematopoiesis was moderately increased, histiocytic proliferation was minimal, and granulomas and *Brucella* immunoreactivities were rare (Figure 4C). These results are again consistent with a model in which *eipA* is required for full *B. abortus* virulence in a mouse model of infection. A summary of spleen pathology scores is presented in Table S1.

We further measured antibody responses in mice infected with  $\Delta eipA$  and wild-type strains. Serum levels of total IgG, *Brucella*-specific IgG, IgG1, and IgG2a were measured by enzyme-linked immunosorbent assay (ELISA) (Figure 3C-F). At 8 weeks post-infection, total serum

IgG was higher in all infected mice relative to the uninfected control (Figure 3C). The level of *Brucella*-specific IgG was ~3 to 6 times higher in  $\Delta eipA$ -infected mice than in mice infected with wild-type or the complemented strain, respectively (Figure 3D). The wild-type-,  $\Delta eipA$ - and complement strain-infected mice displayed similar increases in IgG1 and IgG2a at 8 weeks post infection (Figure 3E and F). We conclude that  $\Delta eipA$  elicits a more robust humoral response than wild-type *B. abortus*. However, we cannot discern whether clearance of the  $\Delta eipA$  strain is mediated by these antibodies, or if antibody production is simply a consequence of antigen release triggered by host clearance of  $\Delta eipA$  by other mechanisms known to control *Brucella* spp. infection in mice (6, 39-42).

### **$\Delta eipA$ strains are sensitive to cell envelope stressors**

To test whether reduced virulence of  $\Delta eipA$  is related to a growth defect or sensitivity to environmental stresses, we used the Biolog phenotyping platform (43) to assay growth of *B. abortus* wild-type and  $\Delta eipA$  strains under 1,920 distinct metabolic and chemical/drug conditions. Compared to wild type, the  $\Delta eipA$  strain had growth defects in a number of conditions, including in the presence of molecules known to alter cell envelope integrity (Figure 5A and Table S2). Thioridazine and carbenicillin had the strongest effects on  $\Delta eipA$  growth. Thioridazine is reported to affect cell wall integrity in *Staphylococcus* (44, 45); carbenicillin inhibits cell wall synthesis (46). Captan and lidocaine also strongly inhibited growth of  $\Delta eipA$ . Captan was shown to alter membrane integrity in *Saccharomyces cerevisiae* (47) while lidocaine is reported to disrupt bacterial inner membrane potential and permeabilize the outer membrane (48). Sodium lactate also impaired  $\Delta eipA$  growth: lactic acid has the capacity to disrupt the Gram negative outer membrane (49). *B. abortus*  $\Delta eipA$  was also highly sensitive to rolitetracycline, guanine and dichlofluanid.

Notably, the  $\Delta eipA$  strain had a growth advantage compared to wild type in the presence of certain molecules (Figure 5A and B) including 4-chloro-3,5-dimethyl-phenol (chloroxylenol). This antiseptic is reported to destabilize the cell wall of Gram positive and Gram negative bacteria (50).  $\Delta eipA$  had a relative advantage in pentachlorophenol, which can destabilize membranes in mammalian cells (51) and in oxophenylarsine, a membrane-permeable inhibitor of tyrosine phosphatases (52). The regulation of capsular and extracellular polysaccharide synthesis often involves tyrosine phosphatases (53, 54). *B. abortus*  $\Delta eipA$  also had a small growth advantage in presence of plumbagin, chlorodinitrobenzene, L-cysteine, and tyrosine-tryptophan dipeptide.

To validate the envelope stress sensitivity phenotype of *B. abortus*  $\Delta eipA$ , we further measured growth on TSA plates supplemented with known membrane stressors including EDTA (55), and ampicillin (56). We also tested the ability of this strain to grow under hyperosmotic (high NaCl) conditions (57).  $\Delta eipA$  had 1 to 3 log growth defects compared to wild type when titered on TSA (Tryptic Soy Agar) plates containing these compounds (Figure 5B). Restoration of the  $\Delta eipA$  locus to the wild-type allele complemented these phenotypes (Figure 5B). Together, these results provide evidence that *eipA* plays a role in *B. abortus* cell envelope integrity and is required for full resistance to these stressors. Though  $\Delta eipA$  strains are sensitive to stress, we observed no apparent morphological defects in liquid broth by light microscopy or cryo-electron microscopy (Figure 5C and D).

Considering that *eipA* is conserved in Alphaproteobacteria, we tested whether deleting this gene in another species would result in similar stress sensitivity. It was previously reported in *Caulobacter crescentus* that deletion of *eipA* (CC\_1035) had no effect on morphology or growth (22). We tested whether *C. crescentus*  $\Delta eipA$  was sensitive to sodium dodecyl sulfate



(SDS), a known membrane stressor. *C. crescentus*  $\Delta eipA$  had a 5-log growth/survival defect in the presence of 0.003% SDS compared to wild-type, confirming a role for EipA in cell envelope stress resistance in this species (Figure S2).

### ***eipA* is essential in *Brucella ovis* and is synthetically lethal with genes that function in O-polysaccharide biosynthesis in *B. abortus***

Multiple attempts to delete the *eipA* ortholog in *Brucella ovis* (gene locus *bov\_1054*; 100% identity to *bab1\_1612*) were unsuccessful suggesting that *eipA* is essential in this species. We generated and sequenced a *B. ovis* transposon (Tn-Himar) insertion library, which provided further evidence of the essentiality of this gene: no transposon insertions were observed in *eipA* in *B. ovis*. In contrast, we observed many insertions in *eipA* in a *B. abortus* Tn-Himar library that was constructed in parallel (Figure 6A).

To better understand the role of *eipA* in *Brucella* biology, we created a third transposon library in the *B. abortus*  $\Delta eipA$  background aimed at identifying genes that are synthetically lethal with *eipA*. Specifically, we sought to identify genes that are dispensable in wild-type cells, but essential in the absence of *eipA*. We discovered 14 such synthetic lethal genes in *B. abortus* (Figure 6B and C) that have all been previously reported to play a role in O-polysaccharide synthesis (10, 58-68); mutations in this gene set result in a rough phenotype in *Brucella melitensis* (58). It is well established that *B. ovis* is a rough strain that lacks LPS O-polysaccharide (28, 58, 69, 70). Indeed, many of the O-polysaccharide genes that are synthetically lethal with *eipA* in *B. abortus* are frame-shifted, carry nonsense mutations, or are absent from the genome of *B. ovis* (Figure 6C) (28, 71). The degradation of O-polysaccharide genes in *B. ovis* is likely the reason that *eipA* is essential in this species. Notably, *B. abortus* gene *bab1\_2092* (*bvrR*) was also synthetically lethal with *eipA* (Figure 6B and C). This response regulator is part of a two-component system (BvrR/S) that contributes to homeostasis of the outer membrane, controlling the structure of the LPS and the expression of periplasmic and outer membrane proteins (66-68).

### ***B. abortus* $\Delta eipA$ maintains smooth LPS**

Our data provide evidence for a genetic interaction between *eipA* and O-polysaccharide biosynthesis in *Brucella* spp. Considering that smooth LPS (containing O-polysaccharide) is an important virulence determinant, a loss of smooth LPS in the *B. abortus*  $\Delta eipA$  strain could explain the virulence defects of this strain. To test if *eipA* plays a role in smooth LPS synthesis, we assayed wild-type and  $\Delta eipA$  agglutination in the presence of serum from a *B. abortus*-infected mouse. The serological response to smooth *Brucella* species is primarily to LPS (72), and thus agglutination provides some indication of whether the LPS O-polysaccharide is present (smooth) or absent (rough). Both *B. abortus* strains agglutinated in the presence of serum, providing evidence for the presence of O-polysaccharide in  $\Delta eipA$  (Figure 7A). As a negative control, we incubated the rough strain *B. ovis* with the mouse serum; as expected this strain did not agglutinate (Figure 7A). Similarly, we also tested the ability of acriflavine to agglutinate *B. abortus* wild-type and  $\Delta eipA$  strains. Acriflavine is a molecule known to agglutinate rough strains such as *B. ovis*. After 2 hours of incubation, we observed no agglutination of *B. abortus* wild-type or  $\Delta eipA$ . As a positive control, we treated *B. ovis* with acriflavine and observed agglutination (Figure 7B). Together, these data indicate that deletion of *eipA* does not result in loss of smooth LPS to an extent that is sufficient to alter agglutination phenotypes.

### **EipA is a periplasmic protein with an unusual $\beta$ -barrel fold**

Atomic-level 3D structure can provide insight into the molecular basis of protein function. As such, we solved an x-ray crystal structure of *B. abortus* EipA (PDB ID code: 5UC0). EipA formed hexagonal crystals of space group  $P6_3$  ( $a=b=113.075$  Å,  $c=64.308$  Å,  $\alpha=\beta=90^\circ$ ,  $\gamma=120^\circ$ ) that diffracted to 1.73 Å resolution; we refined this structure to an  $R_{\text{work}}=0.176$  and  $R_{\text{free}}=0.208$ . Crystallographic data and refinement statistics are summarized in Table S4.

Two EipA molecules are present in the crystallographic asymmetric unit, with molecules interacting through hydrogen bonds between the main chains of residues present in  $\beta$ -strand 6 (Figure S3A). Each EipA monomer (N39-F198) consists of 10 antiparallel  $\beta$ -strands, with  $\beta 1$ - $\beta 5$  and  $\beta 8$ - $\beta 10$  forming a small  $\beta$ -barrel of  $\sim 15$  Å diameter.  $\beta 6$  and  $\beta 7$  form an antiparallel hairpin loop that is positioned at the surface of this  $\beta$ -barrel. Four additional  $\alpha$ -helices ( $\alpha 1$ - $\alpha 4$ ) are also present, and positioned at the external surface of the  $\beta$ -barrel (Figure 8A). The surface of the protein is positively and negatively charged and presents important hydrophobic patches (Figure S4A). The barrel lumen is filled with hydrophobic side chains. No cavity or empty space is found within the barrel, and ends are obstructed by  $\alpha 3$  and  $\alpha 4$ , two small  $\alpha$ -helices present in the loops connecting  $\beta 4$ - $\beta 5$  and  $\beta 9$ - $\beta 10$ , respectively. The structure suggests that EipA, in this conformation, cannot accommodate small molecules or ligands in its lumen (Figure S4B). We searched the Dali database (73) with the EipA structure, but did not uncover proteins that are clear structural homologs. Structures of *Rhodococcus equi* virulence-associated proteins (VapG, VapD, and VapB, (74)) had the most significant root mean square deviation (rmsd) ( $\sim 3$ ), Z-score ( $\sim 7$ ), and sequence identity ( $\sim 10$  and 13%) (Table S5 and Figure S5). A functional connection between these proteins, if any, is not evident. Electron density that we assign to polyethylene glycol (PEG), four sulfate ions and two chloride ions is also evident in the EipA crystal structure (Figure S4C).

EipA is dimeric in the asymmetric unit and, with other dimers present in adjacent asymmetric units, forms an apparent homohexameric complex (Figure S3B). To test whether EipA forms such a complex in solution, we performed size exclusion chromatography on purified *B. abortus* EipA. EipA eluted at a volume with an apparent molecular mass of 13 kDa, which is consistent with a monomer (Figure 9A). There was no evidence of larger oligomers by gel filtration. As a second approach, we performed a bacterial two-hybrid protein interaction assay. EipA<sup>L31-F198</sup> was fused to the T25, T18 or T18C fragments of the *Bordetella pertussis* adenylate cyclase, and the different combinations (T25-EipA and EipA-T18 or T25-EipA and T18C-EipA) were transformed into *E. coli* BTH101 and spotted on LB agar supplemented with Xgal, kanamycin and carbenicillin. After overnight growth at 30°C, only the positive control showed evidence of protein interaction; the spots corresponding to the different EipA T25/T18 combinations remained white, providing additional evidence that EipA does not form higher order oligomers in cells (Figure 9B).

The N-terminal 38 amino acids (M1-E38) of *B. abortus* EipA have signal peptide features, as predicted by SignalP 4.2 (75). To evaluate whether EipA is indeed secreted to the periplasm, we created fusions to *Escherichia coli* alkaline phosphatase (PhoA) and expressed these fusions in *B. ovis*. One fusion included the full-length EipA protein (M1-F198) C-terminally fused to *E. coli* PhoA (R22-K471) and the other lacked the hypothetical signal peptide (EipA(L31-F198)-PhoA(R22-K471)). We placed both fusions under the control of a *lac* promoter. After overnight growth in *Brucella* broth in presence or absence of 1 mM IPTG, we adjusted each culture to the same density and loaded into a 96-well plate containing 5-bromo-4-Chloro-3-indolyl phosphate (BCIP, final concentration 200  $\mu\text{g ml}^{-1}$ ). When hydrolyzed by PhoA, BCIP undergoes a color change to blue. Since BCIP diffusion through the inner membrane is inefficient, this reagent can be used to measure PhoA activity in the periplasmic

space or in the extracellular medium (76). After 2 hours incubation at 37°C, the well containing the *B. ovis* cells expressing the EipA<sup>M1-F198</sup>-PhoA<sub>EC</sub> fusion turned dark blue. No color change was observed in the well containing the *B. ovis* strain expressing the EipA<sup>L31-F198</sup>-PhoA<sub>EC</sub> protein fusion (Figure 9C). As expected, absence of induction with 1 mM IPTG resulted in lack of fusion expression and no color change (Figure 9C). To test if EipA is secreted into the growth medium, we performed a similar experiment on spent medium supernatants from the different cultures. After 2 hours incubation, no color change was observed, suggesting that the EipA-PhoA<sub>EC</sub> is not secreted from the cell. Our data provide evidence that EipA is a monomeric periplasmic protein that folds into a small, eight-stranded β-barrel with a hydrophobic lumen.

### ***eipA* depletion results in a cell division defect in *B. ovis***

As outlined above, *eipA* is essential in *B. ovis* and, therefore, cannot be deleted. To assess the effects of loss of *eipA* in *B. ovis*, we generated a strain in which we placed *eipA* under the control of an IPTG-inducible promoter. In the presence of inducer, we successfully deleted the chromosomal copy of *eipA*. Shifting this strain to Schaedler Blood Agar (SBA) plates lacking IPTG resulted in a dramatic defect in growth/survival relative to wild-type (Figure 10A). This defect was abolished by induction of *eipA* with IPTG (Figure 10A). Moreover, the *eipA* depletion strain exhibited a morphological defect in the absence of inducer when cells were cultivated on agar plates; cells did not properly divide resulting in a chaining phenotype (Figure 10B). As expected, addition of IPTG inducer restored morphology to that of the wild-type strain (Figure 10B). This result supports a model in which EipA plays a role in *B. ovis* cell division. It is important to note that we did not observe a defect in growth or morphology by light microscopy when the depletion strain was cultivated in liquid broth without IPTG (Figure S6). The basis of this phenotypic difference between liquid and solid medium is not presently understood.

## **Discussion**

CtrA is an essential regulator of cell development and cell cycle progression in Alphaproteobacteria (32). A gene encoding a protein of unknown function, DUF1134, is a core member of the CtrA regulon (21-25, 35). The conserved regulation of this gene by CtrA strongly suggested that it plays an important role in the biology of Alphaproteobacteria. In this study, we have characterized function of the *B. abortus* DUF1134 protein, which we have named envelope integrity protein A, or EipA. Expression of EipA is activated by CtrA (Figure 2) and deletion of *eipA* reduced *B. abortus* virulence in both *in vitro* and *in vivo* infection models (Figure 3). A *B. abortus* Δ*eipA* strain is highly sensitive to envelope stressors relative to wild type, but Δ*eipA* has no apparent defect in growth or morphology in the absence of stress (Figure 5). *eipA* deletion in *C. crescentus* results in hyper-sensitivity to SDS, providing evidence that the function of this protein is conserved across genera (Figure S2).

Strikingly, *eipA* is essential in the ovine pathogen, *Brucella ovis* (Figure 6). Unlike *B. abortus*, *B. ovis* forms rough colonies and does not synthesize LPS O-polysaccharide (28). We defined a genetic connection between *eipA* and smooth LPS, demonstrating that a set of genes involved in O-polysaccharide production are synthetically lethal with *eipA* in *B. abortus* (Figure 6). The majority of these synthetically lethal genes are degenerated or absent in *B. ovis* (28), which likely explains the essential nature of *eipA* in this species (Figure 6). LPS O-polysaccharide is known to act as a protective layer against host stressors including cationic peptides, reactive oxygen and complement-mediated lysis and is a key molecule for *Brucella* spp. survival and replication in the host (10). However, *B. abortus* Δ*eipA* retains its smooth

LPS (Figure 7). Thus, the exact molecular/cellular defect in a *B. abortus*  $\Delta eipA$  that results in envelope stress sensitivity remains undefined.

We have further shown that EipA is a monomeric periplasmic protein (Figure 9) that adopts an unusual  $\beta$ -barrel fold, loosely related to *R. equi* virulence-associated proteins (Figure S5). The structure of EipA alone does not provide clear evidence of its molecular function in the *B. abortus* cell. The EipA  $\beta$ -barrel appears to be too short and hydrophilic to be inserted in the inner or outer membranes. We propose that EipA remains in the periplasm where it may be bound to peptidoglycan or to other proteins as part of a complex. We cannot exclude the possibility that the lumen of EipA binds a ligand. However, this seems unlikely since the barrel lumen is fully occupied by hydrophobic side chains and would require substantial conformational rearrangement to accommodate a ligand (Figure S4B). Despite substantial progress in characterizing EipA (DUF1134) in this present study, the detailed molecular function of this protein family remains unclear. Considering the data presented here, it is probable that this protein plays a direct or indirect role in cell division and/or envelope biosynthesis. These two processes are intimately linked to *Brucella* spp. virulence and survival in the host intracellular niche (77).

In synchronized *C. crescentus* cultures, CtrA-dependent expression of EipA (CC\_1035) begins in the middle of S phase of the cell cycle and terminates in G2 (21, 78-83). *C. crescentus* cells become predivisional at this developmental stage and begin to invaginate and divide. Given its expression pattern, it is reasonable to predict that EipA is involved in some aspect of envelope synthesis and/or cell division. Such a model is supported by the chaining phenotype observed in the *B. ovis* depletion strain (Figure 10) and the sensitivity of *B. abortus* and *C. crescentus* *eipA* deletion strains to membrane stressors (Figures 5 and S2). The molecular connection between O-polysaccharide biosynthesis and the *B. ovis* chaining phenotype upon *eipA* depletion remains undefined, though it is established that alteration of LPS structure can influence morphology and division in *C. crescentus* (84). It has also been reported that teichoic acids, carbohydrate components of Gram-positive envelopes, play a role in the initiation of cell division (85). EipA may serve in part as a bridge that links the state of envelope carbohydrates with the cell division apparatus. Future studies aimed developing a more complete understanding of the role of EipA in control of cell division and cell envelope integrity in Alphaproteobacteria are ongoing.

## Materials and Methods

All experiments using live *B. abortus* 2308 were performed in Biosafety Level 3 facilities according to United States Centers for Disease Control (CDC) select agent regulations at the University of Chicago Howard Taylor Ricketts Laboratory.

### Chromosomal deletions in *B. abortus*, *B. ovis* and *C. crescentus*

The *B. abortus*  $\Delta eipA$  deletion strain was generated using a double recombination strategy. Fragments corresponding to the 500 basepair upstream region and to the 500 basepair downstream region of *eipA* were ligated (T4 DNA ligase, New England Biolabs) into the linearized suicide plasmid pNPTS138 which carries the *nptI* gene for initial selection and the *sacB* gene for counter-selection on sucrose. After sequencing, the plasmid was transformed into the wild-type *B. abortus* 2308 strain by mating, and single crossover integrants were selected on SBA plates supplemented with kanamycin (50  $\mu\text{g ml}^{-1}$ ). Counter-selection for the second crossover event was carried out by growing kanamycin-resistant colonies overnight under nonselective conditions and then plating on SBA plates supplemented with 5% sucrose



(150 mM). Colonies containing the deletion alleles were identified by PCR screening, and the PCR products were confirmed by sequencing. Genetic complementation of the deletion strain was carried out by transforming the *B. abortus* deletion strain with the pNPTS138 plasmid carrying the wild-type allele locus. For *eipA* deletion in *C. crescentus strain NA1000*, an omega interposon was inserted in the *CC\_1035* locus (22). The primers, restriction enzymes, plasmids, and strains used are listed in Tables S6 and S7.

To delete *eipA* in a *B. ovis* strain carrying the kanamycin resistant pSRK-*eipA* plasmid, the same strategy was adopted except that a chloramphenicol resistant version of pNPTS138 was used and all the SBA plates and liquid medium used for growth and selection were supplemented with 1 mM isopropyl  $\beta$ -D-1-thiogalactopyranoside (IPTG) to induce constitutive expression of *eipA*.

### Electrophoretic mobility shift assay (EMSA)

Full-length *ctrA* (residues 1 - 232) from *B. abortus* was PCR amplified. The primers used for this cloning are listed in Table S6. The resulting PCR product was then digested with NdeI / XhoI restriction enzymes (New England Biolabs) and ligated (T4 DNA ligase, New England Biolabs) into similarly digested pET28a plasmid. The ligation was then transformed into *E. coli* Top10. After plating on LB agar plates + 50  $\mu\text{g ml}^{-1}$  kanamycin, the resulting clones were sequence verified and transformed into the protein overexpression *E. coli* Rosetta(DE3) *plysS* strain (Table S7). For overexpression of His-tagged CtrA, 2 liters of terrific broth (+ 50  $\mu\text{g ml}^{-1}$  kanamycin) were inoculated with a 100 ml of an overnight culture. Culture was grown at 37°C / 220 rpm to OD<sub>600</sub> ~ 0.8, chilled in an ice bath for 20 minutes and induced with 0.5 mM IPTG. CtrA was allowed to express overnight at 16°C, before cells were pelleted by centrifugation and stored at -20°C. For purification, a cell pellet was suspended in 50 ml of resuspension buffer (25 mM Tris pH 7.6, 125 mM NaCl, 10% glycerol) and lysed by two passages through a LV-1 microfluidizer. The lysate was then clarified by centrifugation and mixed with 2.5 ml of Ni-NTA resin on a dripping column. The resin was washed with 5 column volumes (CV) of resuspension buffer, followed by a 5 CV wash with detergent wash (25 mM Tris pH 7.6, 125 mM NaCl, 10% glycerol, 5% Triton-X100), a 5 CV wash with a high salt wash (25 mM Tris pH 7.6, 650 mM NaCl, 10% glycerol) before elution with an imidazole gradient (0 - 500 mM imidazole in resuspension buffer). The purity of the different fractions was assessed on a 12% SDS-PAGE gel. Eluted protein was then dialyzed overnight against a dialysis buffer (25 mM Tris pH 7.6, 125 mM NaCl, 10% glycerol, 0.5 mM EDTA), before being snap frozen in liquid nitrogen and stored at -80°C until needed.

For electrophoretic mobility shift assay, a DNA fragment corresponding to the 131 nucleotides present upstream of *eipA* start codon was PCR amplified and used as a probe (see Table S6 for primer information). The DNA fragment was then end labeled using <sup>32</sup>P- $\gamma$ -ATP and T4 Polynucleotide kinase (New England Biolabs). For gel-shift assays, 0.1 ng of the radiolabeled probe were mixed with increasing concentrations (9 - 500 nM) of purified CtrA in 1 x binding buffer (25 mM Tris pH 7.6, 1 mM MgCl<sub>2</sub>, 1 mM MnCl<sub>2</sub>, 1 mM CaCl<sub>2</sub>, 50 mM KCl, 2% glycerol, 0.01 mg ml<sup>-1</sup> BSA, 0.5  $\mu\text{M}$  EDTA). Binding reactions were allowed to proceed for 30 minutes on ice before being loaded on a 8% Tris Borate EDTA (TBE) polyacrylamide gel, equilibrated with 1 x Tris Acetate EDTA (TAE) running buffer and run at 100 volts for 90 minutes at 4°C. To mutate the putative CtrA binding site present in this 131-nucleotide fragment, a gBlock gene fragment (Integrated DNA Technology, IDT) carrying mutations in the putative CtrA binding site was used as a PCR template (see Table S6).

### Western blotting

For Western blot analysis, cultures of *B. abortus* were grown in Brucella broth overnight in the presence or absence of kanamycin ( $50 \mu\text{g ml}^{-1}$ ) and IPTG (5 mM) as required. For each condition, 5 ml of cultures (at  $\text{OD}_{600} \sim 1$ ) were pelleted and resuspended in 500  $\mu\text{l}$  of 4 x SDS loading buffer supplemented with DNase I (New England Biolabs) before boiling at  $95^\circ\text{C}$  for 5 minutes. 15  $\mu\text{l}$  of each sample was then resolved on a 12% SDS PAGE gel and transferred to a Millipore 0.45  $\mu\text{m}$  polyvinylidene difluoride (PVDF) membrane (Millipore) using a Trans-Blot turbo transfer system (Bio-Rad). After transfer, the membrane was washed in Tris-buffered saline - Tween 20 (TBST) supplemented with 5% milk and blocked overnight in fresh milk solution. The membrane was then incubated with 10 ml of TBST, 5% milk with an appropriate dilution of anti-EipA (1:5000), anti-CtrA (1:10000) or anti-PhyR (1:5000) rabbit antibodies for 1 hour at room temperature. After a 30-min wash with TBST, the membrane was incubated for 1 hour in 10 ml TBST, 5% milk with a 1:5000 dilution of HRP-conjugated anti-mouse horseradish peroxidase (HRP; Thermo Scientific) or anti-rabbit antibody conjugated to Alexa 488 (Life Technologies) secondary antibodies. After a final 30-min wash in TBST, the Western blot was developed with SuperSignal West Femto chemiluminescent substrate (Thermo Fisher Scientific). To visualize the bands and quantify the total amount of protein loaded in the gel, we used the Bio-Rad ChemiDoc MP imaging system.

Primary polyclonal EipA rabbit-antiserum was generated by Josman LLC. Primary CtrA polyclonal antiserum was a gift from Dr. Peter Chien (University of Massachusetts, Amherst, MA) and *Brucella* anti-PhyR polyclonal antiserum (86) was used as a loading control.

### **Cell culture and macrophage infection assay**

Human monocytic THP-1 cells (ATCC TIB-202) were cultured in Roswell Park Memorial Institute (RPMI) 1640 medium supplemented with 10% (v/v) heat-inactivated fetal bovine serum and 2 mM L-glutamine. Differentiation of the cells into inactivated macrophages was induced by the addition of  $40 \text{ ng ml}^{-1}$  phorbol 12-myristate 13-acetate (Sigma) for 48 hours at  $37^\circ\text{C}$  in a 5%  $\text{CO}_2$  atmosphere. Prior to infection, bacteria were harvested from SBA plates, resuspended in sterile RPMI 1640 medium, and cell densities were adjusted. For infection assays,  $5 \times 10^4$  THP-1 cells were infected with  $5 \times 10^6$  *B. abortus* cells to achieve a multiplicity of infection of 1:100 in 96-well plates. To synchronize the infections after the addition of the *Brucella* cells, the plates were centrifuged at  $200 \times g$  for 5 min. After 30 min of incubation at  $37^\circ\text{C}$  in a 5%  $\text{CO}_2$  atmosphere, the medium was removed and replaced with 200  $\mu\text{l}$  of RPMI 1640 medium supplemented with gentamycin ( $50 \mu\text{g ml}^{-1}$ ) and incubated for 1 hour at  $37^\circ\text{C}$  in a 5%  $\text{CO}_2$  atmosphere to kill extracellular bacteria. To determine the numbers of intracellular bacteria at 1 hour post-infection, the cells were washed once with 200  $\mu\text{l}$  of PBS and lysed with 200  $\mu\text{l}$  of PBS supplemented with 0.1% Triton X-100. The lysate was serially diluted and plated on Tryptic Soy Agar (TSA) plates to enumerate CFU. For longer time points (24 and 48 hours), the RPMI +  $50 \mu\text{g ml}^{-1}$  gentamycin was removed and replaced by RPMI +  $25 \mu\text{g ml}^{-1}$  gentamycin to kill extracellular bacteria released over the time course. At 24 or 48 hours post infection, cells were washed, lysed and *Brucella* CFU were enumerated as above. For each strain, three independent replicates per data point were performed.

### **Mouse infection assay**

All mouse studies were approved by the University of Chicago Institutional Animal Care and Use Committee (IACUC). *B. abortus* strains were harvested from SBA plates, resuspended in sterile PBS and diluted to a final concentration of  $5 \times 10^5$  CFU  $\text{ml}^{-1}$ . For this experiment, 5 mice per strain and per time point were used. One hundred microliters of each bacterial suspension containing  $5 \times 10^4$  CFU was injected intraperitoneally into 6-week-old female BALB/c mice

(Harlan Laboratories, Inc.). At 1, 4, and 8 weeks post-infection, 5 mice per strain were sacrificed, and spleens were removed for weighing and CFU counting. For bacterial enumeration, each spleen was homogenized in 5 ml of sterile PBS supplemented with 0.1% Triton X-100. Each homogenized spleen solution was then serially diluted, and 10  $\mu$ l of each dilution were spotted on TSA plates and grown for three days at 37°C in a 5% CO<sub>2</sub> atmosphere before being counted. At week 8, blood was also collected by cardiac-puncture and serum from each mouse (3 from naïve, 2 from WT-infected, and 4 from  $\Delta eipA$  and complementation-infected mice) was separated from blood using a serum separation tube (Sarstedt). Sera were subsequently used for Enzyme-Linked ImmunoSorbent Assays (ELISA).

### Determination of antibody responses at 8 weeks post infection

Mouse serum Immunoglobulin G (IgG) titers were measured using an Enzyme Linked ImmunoSorbent Assay (ELISA) in 96-well ELISA plates (Nunc-immuno MaxiSorb, Sigma). Total mouse serum IgG, IgG1, and IgG2a titers were measured using mouse-specific ELISA kits by following manufacturer's instructions (eBioscience). To determine *Brucella*-specific IgG titers, ELISA plates were coated with 100  $\mu$ l of heat-killed bacterial suspensions prepared in PBS (OD<sub>600</sub>=2.0) from *B. abortus* grown for 2 days on SBA plates. Cultures were heat-killed at 65°C for 1 hour, cooled to room temperature, and treated with kanamycin (50  $\mu$ g ml<sup>-1</sup>) and gentamycin (50  $\mu$ g ml<sup>-1</sup>) to prevent bacterial growth. The signal from all ELISA plates were measured at 450 nm with a 570 nm background correction using a Tecan Infinite M200 PRO fluorescence plate reader.

### Spleen histology

At 8 weeks post infection, spleens (n = 1 per strain) were prepared for histology. Spleens were first fixed with formalin for 7 days. Formalin was removed and replaced with fresh formalin and fixed for another 7 days before washing and subsequently transferring spleens to 70% ethanol. Whole spleens were submitted for tissue embedding, Hematoxylin and Eosin (H & E) staining, and immunohistochemistry to Nationwide Histology (Veradale, Washington). For immunohistochemistry, goat anti-*Brucella* IgG was used (Tetracore, Inc). We subsequently analyzed and scored slides at the University of Chicago. Pictures of fixed mouse spleens were taken at the University of Chicago Integrated Light Microscopy Facility on a Cambridge Research and Instrumentation whole slide scanner fitted with an Allied Vision Technologies Stingray F146C color camera.

### Bacterial Phenotype MicroArray screening

Bacterial Phenotype MicroArray (PM) assays were carried out according to manufacturer's protocols (Biolog). Briefly, *B. abortus* strains (wild-type and  $\Delta eipA$ ; strain information available in Table S7) were streaked out and cultivated at 37°C and 5% CO<sub>2</sub> for 48 hours on an SBA plate, re-streaked, and grown for another 48 hours. Cells were scraped off the plate and resuspended in 1x IF-0a medium (Biolog) at a final density equivalent to 5% transmittance at OD<sub>600</sub>. PM inoculating fluids (PM1-9+) were prepared from 0.2  $\mu$ m filter-sterilized stock solutions at the following final concentrations: **PM1-2**: 2 mM MgCl<sub>2</sub>, 1 mM CaCl<sub>2</sub>, 25  $\mu$ M L-arginine, 50  $\mu$ M L-glutamic acid, 5  $\mu$ M  $\beta$ -NAD, 25  $\mu$ M hypoxanthine, 25  $\mu$ M 5'-UMP, 25  $\mu$ M L-cystine (pH 8.5), 0.005% yeast extract, and 0.005% tween 40; **PM3, 6, 7, 8**: 20 mM tricarballic acid (pH 7.1), 2 mM MgCl<sub>2</sub>, 1 mM CaCl<sub>2</sub>, 5  $\mu$ M  $\beta$ -NAD, 25  $\mu$ M hypoxanthine, 25  $\mu$ M 5'-UMP, 25  $\mu$ M L-cystine (pH 8.5), 0.005% yeast extract, 0.005% tween 40, 0.625 mM D-glucose, and 5 mM pyruvate; **PM4**: 20 mM tricarballic acid (pH 7.1), 2 mM MgCl<sub>2</sub>, 1 mM CaCl<sub>2</sub>, 25  $\mu$ M L-arginine, 50  $\mu$ M L-glutamic acid, 0.005% yeast extract, 0.005% tween 40,

0.625 mM D-glucose, and 5 mM pyruvate; **PM5**: 20 mM tricarballic acid (pH 7.1), 2 mM MgCl<sub>2</sub>, 1 mM CaCl<sub>2</sub>, 0.625 mM D-glucose, and 5 mM pyruvate; **PM9-PM20**: 2 mM MgCl<sub>2</sub>, 1 mM CaCl<sub>2</sub>, 0.005% yeast extract, 0.005% tween 40, 2.5 mM D-glucose, and 5 mM pyruvate. PM1-5 inoculating fluids (IF) were prepared in a final 1x concentration of IF-0a GN/GP (Biolog) while PM9+ inoculating fluids were prepared at a final 1x concentration of IF-10b GN/GP (Biolog). All solutions had a Dye Mix G containing tetrazolium (Biolog) added to a final 1x concentration. A 1:13.6 dilution of 5% transmittance *B. abortus* suspension was added to each inoculating fluid. 100 µl per well of *B. abortus*-containing inoculating fluids were dispensed to each PM plate. PM plates were incubated at 37°C and 5% CO<sub>2</sub>, and absorbance of tetrazolium reduced by bacterial growth (at 630 nm) was measured daily for 6 days (?) using a Tecan Infinite 200 PRO microplate reader.

### Plate stress assays

For stress assays, the *B. abortus* strains were first grown for three days on SBA plates. Cells were then harvested and resuspended in sterile PBS to an OD<sub>600</sub> of ~ 0.015 (~ 1 x 10<sup>8</sup> CFU ml<sup>-1</sup>). The different cell suspensions were then serially diluted in a 96-well plate and, using a 48-pin replicator, were spotted on plain TSA plates or TSA plates supplemented with 5 µg ml<sup>-1</sup> ampicillin, 200 mM NaCl, or 2 mM EDTA. Each spot correspond to ~ 3 µl. Plates were grown for three days at 37°C in a 5% CO<sub>2</sub> atmosphere before being counted. All experiments were performed in quadruplicate and compared to strains grown on plain TSA plates (no stress). The same protocol was used to test the SDS tolerance *C. crescentus* wild-type and  $\Delta eipA$  strains (see Table S7 for strain information); PYE agar plates with or without 0.003% SDS were used for this assay and grown at 30°C for 3 days.

### Cryo-electron microscopy

Overnight *Brucella* cultures were used to inoculate (at a starting OD<sub>600</sub> of ~0.015) 2 ml of *Brucella* broth supplemented with or without 2 mM EDTA or ampicillin (0.5 µg ml<sup>-1</sup>). After 4 hours of treatment at 37°C / 5% CO<sub>2</sub> / 220 rpm, cells were harvested by centrifugation (5000 x g / 10 min) and the pellets were resuspended in PBS + 4% formaldehyde to fix the cells. Cell killing was confirmed before sample removal for imaging. After 1 hour, cells were pelleted and resuspended in 500 µl EM buffer (20 mM Tris pH 7.6, 50 mM glucose, 10 mM EDTA). Fixed *Brucella* cells were vitrified on glow-discharged 200 mesh copper EM-grids with extra thick R2/2 holey carbon film (Quantifoil). Per grid, 3 µl of the sample was applied and automatically blotted and plunged into liquid ethane with the Leica EM GP plunge-freezer. Images were collected on a Talos L120C TEM (Thermo Fischer) using the Gatan cryo-TEM (626) holder. The images were acquired at a defocus between 8-10 µm, with a pixel size of 0.458 nm.

### Building and mapping the wild-type *B. abortus*, the *B. abortus* $\Delta eipA$ and the wild-type *B. ovis* Tn-himar insertion libraries

To build and map the different Tn-himar insertion libraries, we used a barcoded transposon strategy developed by Wetmore et al (87). Specifically, the *E. coli* APA752 donor strain (WM3064 strain harboring pKMW3 mariner transposon vector library) was conjugated with wild-type *B. abortus*, *B. ovis* or with *B. abortus*  $\Delta eipA$  strain. The WM3064 strain is a *pir+*, DAP auxotroph, competent to transduce plasmids. 100 ml of LB broth + 300 mM DAP were inoculated with a vial of *E. coli* APA752 donor strain and incubated overnight at 37°C / 220 rpm. The next day, the culture was pelleted and mixed with *Brucella* (*ovis* or *abortus*) freshly harvested from 4 SBA plates. The donor and recipient were mixed at an approximate ratio of 1:10 based on optical density. The mixture was then spotted on a SBA plate supplemented



with 300 mM DAP and incubated at 37°C / 5% CO<sub>2</sub> overnight. The next day, the mating was resuspended in 25 ml of *Brucella* broth and OD<sub>600</sub> was measured (OD<sub>600</sub>~16). *mariner* inserts into TA dinucleotide sites in the genome. *Brucella* has ~78,000 TA sites in its genome when considering the sequence of both strands (10 - 15% are considered to be essential). Therefore, approximately 350,000 to 750,000 unique clones will yield a library with 5 - 10 x coverage at each site. To achieve this library diversity, the cell suspension was diluted to OD<sub>600</sub> ~0.016 in 25 ml of *Brucella* broth, and 1 ml was plated on 25 large (150 mm diameter) SBA plates supplemented with kanamycin (50 µg ml<sup>-1</sup>) to yield approximately 20,000 - 40,000 colonies per plate. After three days of growth at 37°C / 5% CO<sub>2</sub>, the colonies from all 25 plates were harvested and resuspended in 25 ml of *Brucella* broth, the OD was measured (OD<sub>600</sub> ~ 95) and this cell suspension was used to inoculate 500 ml of *Brucella* broth with kanamycin (50 µg ml<sup>-1</sup>) at OD<sub>600</sub>=0.15. After 6 hours of growth at 37°C, the culture was pelleted and resuspended to an OD<sub>600</sub> of ~0.4 in 25 ml of *Brucella* broth containing 25% glycerol. 1 ml aliquots were frozen and stored at -80°C until needed.

An aliquot of each Tn insertion library was used to extract the genomic DNA for insertion site mapping. Cells were pelleted (1 min at 12,000 rpm) and resuspended in 100 µl of a Tris EDTA (TE) buffer (10 mM Tris pH 8, 100 µM EDTA). 500 µl of GES lysis buffer were added (for 100 ml of GES lysis solution: 60 g Guanidinium thiocyanate, 20 ml of a 500 mM EDTA (pH 8) solution, 5 ml of 10% v/v lauryl sarkosyl, completed with water). The solution was vortexed and incubated at 60°C for 15 minutes; 250 µl of cold 7.5 M ammonium sulfate were then added. The solution was vortexed and incubated on ice for 10 minutes. 500 µl of 24:1 chloroform:isoamyl alcohol were added, vortexed, and centrifuged at 12,000 rpm for 15 minutes. The upper aqueous phase (~700 µl) was transferred to a new tube and 600 - 700 µl of cold 100% isopropanol were added to precipitate the genomic DNA. After mixing, the DNA was pelleted at 12,000 rpm for 1 minute and washed with 70% ethanol. After removing any residual ethanol, the genomic DNA was resuspended in 50 µl of TE buffer.

To build an Illumina sequencing library enriched in sequences containing the transposon junction we followed the method of Wetmore et al (87). Custom adapters were generated by annealing complementary oligos (Mod2\_TS\_Univ: 5'-ACGCTCTTCCGATC\*T-3', and Mod2\_Truseq: 5'-Phos-GATCGGAAGAGCACACGTCTGAACTCCAGTCA-3'). Both oligonucleotides were diluted in TE buffer to 100 µM and 10 µl of each oligo were mixed. For annealing, the PCR cycling conditions were: 30 minutes at 95°C, and 15 minutes at 70°C. The resulting adapter was diluted to 25 µM using TE buffer. Genomic DNA was sheared to generate 300 - 500 bp fragments. The size selection, end repair, ligation of the custom adapter, and clean up step were performed by the University of Chicago Genomics facility. The PCR amplification step to enrich TN containing fragments was performed using a transposon specific primer, Nspacer\_BarSeq\_pHIMAR (5'ATGATACGGCGACCACCGAGATCTACACTCTTTCCCTACACGACGCTCTTCCGATCTNNNNNCGCCCTGCAAGGGATGTCCACGAG), and an adapter specific primer, P7\_MOD\_TS\_index. Primers with unique indices were used for each sample that was sequenced in the same lane. The following a PCR amplification protocol was used: a 100 µl PCR reaction was prepared by mixing 50 µl of GoTaq Green (2x) master mix (Promega) with 10µl of 50% DMSO, 0.5 µl of each primer (100 µM), 5 µl of sheared adapted-ligated genomic DNA and completed with water and cycled under the following conditions: 94°C for 2 minutes, 25 cycles of [94°C for 30 seconds, 65°C for 20 seconds, 72°C for 30 seconds], 72°C for 10 min. Quality of the PCR product was evaluated on a 2% agarose TBE gel; a smear between 150-500 bp is expected. The PCR products were cleaned with size selection beads to remove

fragments less than 200 bp. PCR products were then sequenced with a 150 bp single end Illumina run using standard Illumina sequencing primers. Next, the barcodes were computationally correlated with insertion sites using the approach previously outlined (87).

Statistics for the three different transposon insertion libraries are reported in Table S3. For each Himar insertion library, Tn-seq read data have been deposited in the NCBI sequence read archive: *B. abortus* 2308 wild type (BioProject PRJNA493942; SRR7943723), *B. ovis* ATCC 25840 wild type (BioProject PRJNA493944; SRR7943724), *B. abortus*  $\Delta eipA$  ( $\Delta bab1\_1612$ ) (accession PRJNA493947; SRR794377).

### Agglutination assay

To compare the agglutination phenotype of our different strains (wild-type *B. abortus* strain,  $\Delta eipA$  strain, and wild-type *B. ovis*; see Table S7 for strain information), the bacteria were grown on SBA plates for three day at 37°C / 5% CO<sub>2</sub>, harvested and resuspended in sterile PBS at OD<sub>600</sub> ~ 0.5. At time 0, 1 ml of each cell suspension was loaded in a spectrophotometer cuvette and mixed with 20  $\mu$ l of wild-type *B. abortus*-infected mouse serum or with acriflavine (final concentration 5 mM) and ODs were measured at 600 nm. As a control, 1 ml of each cell suspension was also kept in a spectrophotometer cuvette without serum or acriflavine. The different samples were then incubated at room temperature for 2 hours and clarification of the samples, which corresponds to the cells agglutinating, was then measured at OD<sub>600</sub>. Cuvettes containing PBS supplemented with serum or acriflavine were used as blanks. For each agglutination condition, three independent cell suspensions per strain were tested.

### Protein expression and purification for crystallization

The DNA fragment corresponding to the EipA protein (residues 39 - 198) was PCR amplified. The PCR product was then cloned into pMCSG73 plasmid using a ligation-independent procedure (88, 89). The primers used for cloning are listed in Table S6. After transformation of the ligation into *E. coli* Top10 strain, the resulting colonies able to grow on an LB agar + ampicillin (100  $\mu$ g ml<sup>-1</sup>) plate were sequence verified. pMCSG73 plasmids with the correct insert were purified and transformed in the *E. coli* BL21-Gold(DE3) strain for protein expression (see strain information listed in Table S7). The pMCSG73 is a bacterial expression vector harboring a tobacco vein mottling virus-cleavable N-terminal NusA tag and a TEV-cleavable N-terminal His<sub>6</sub> and StrepII tag. For protein expression, a 2-liter culture of enriched M9 medium (90) (+ 100  $\mu$ g ml<sup>-1</sup> ampicillin) was grown at 37°C with shaking at 190 rpm. At OD<sub>600</sub> ~1, the culture was cooled to 4°C and supplemented with 90 mg of L-seleno-L-methionine (Se-Met, Sigma) and 25 mg of each methionine biosynthetic inhibitory amino acid (L-valine, L-isoleucine, L-leucine, L-lysine, L-threonine, and L-phenylalanine). Protein expression was induced overnight at 18°C using 0.5 mM IPTG. After centrifugation, cell pellets were resuspended in 35 ml of lysis buffer (500 mM NaCl, 5% (v/v) glycerol, 50 mM HEPES, pH 8.0, 20 mM imidazole, and 10 mM  $\beta$ -mercaptoethanol) per liter of culture and treated with lysozyme (1 mg ml<sup>-1</sup>). The cell suspension was sonicated, and debris was removed by centrifugation. The Se-Met protein was purified via Ni<sup>2+</sup>-affinity chromatography using the ÄKTAexpress system (GE Healthcare). The column was washed with the lysis buffer and eluted in the same buffer containing 250 mM imidazole. Immediately after purification, the His tag was cleaved at 4°C for 24 to 48 hours using a recombinant His-tagged TEV protease, resulting in an untagged protein with an N-terminal Ser-Asn-Ala peptide. A second Ni<sup>2+</sup>-affinity chromatography purification was performed to remove the protease, non-cleaved protein, and affinity tag. The purified protein was then dialyzed against 20 mM HEPES, pH 8.0, 250 mM NaCl, and 2 mM DTT buffer. Protein concentrations were determined by UV absorption

spectroscopy (280 nm) using the NanoDrop 1000 spectro-photometer (Thermo Fisher Scientific). The purified Se-Met EipA protein was concentrated to 43 mg ml<sup>-1</sup> using a centrifugal filter (10 kDa MWCO, Amicon-Millipore).

### Crystallization

Initial crystallization screening was carried out using the sitting-drop, vapor-diffusion technique in 96-well CrystalQuick plates (Greiner Bio-one). Trays were prepared using a Mosquito robot (TTP LabTech) and commercial crystallization kits (MCSG-1-4, Anatrace). The drops were prepared by mixing equal volumes (0.4  $\mu$ l) of the purified protein (43 mg ml<sup>-1</sup>) and the crystallization solution, and equilibrated against 135  $\mu$ l of the same crystallization solution. Crystallization trays were incubated at 16°C. After 3 days, EipA crystallized in the hexagonal space group P6<sub>3</sub> from the condition #15 of the MCSG-2 crystallization kit that contains 200 mM ammonium sulfate, 100 mM sodium cacodylate pH 6.5, 30% PEG8000. Prior to flash freezing in liquid nitrogen, crystals were cryo-protected by briefly washing them in the crystallization solution containing 25% glycerol.

### Crystallographic data collection and data processing

Se-Met crystal diffraction was measured at a temperature of 100 K using a 3-second exposure/degree of oscillation and was collected for 120°. Crystals diffracted to a resolution of 1.73 Å and the corresponding diffraction images were collected on the ADSC Q315r detector with an X-ray wavelength near the selenium edge of 12.66 keV (0.97929 Å) for SAD phasing at the 19-ID beamline (SBC-CAT, Advanced Photon Source, Argonne, Illinois). Diffraction data were processed using the HKL3000 suite (91). EipA crystals were twinned and the data had to be reprocessed and scaled from the hexagonal P6<sub>3</sub>22 space group to the lower symmetry space group P6<sub>3</sub> with the following cell dimensions:  $a=b=113.08$  Å,  $c=64.31$  Å, and  $\alpha=\beta=90^\circ$ ,  $\gamma=120^\circ$  (see Table S1). The structure was determined by SAD phasing using SHELX C/D/E, mlphare, and dm, and initial automatic protein model building with Buccaneer software, all implemented in the HKL3000 software package (91). The initial model was manually adjusted using COOT (92) and iteratively refined using COOT, PHENIX (93), and/or REFMAC (94); 5% of the total reflections was kept out of the refinement in both REFMAC and PHENIX throughout the refinement. The final structure converged to an  $R_{\text{work}}$  of 17.6% and  $R_{\text{free}}$  of 20.8% and includes two protein chains (A: residues 39-198; and B: 39-198), 4 sulfates, two chloride ions, two polyethylene glycol (5 C-C-O chains) molecules, and 322 ordered water molecules. The EipA protein contained three N-terminal residues (Ser-Asn-Ala) that remain from the cleaved tag. The stereochemistry of the structure was checked using PROCHECK (95), and the Ramachandran plot and was validated using the PDB validation server. Coordinates of EipA have been deposited in the PDB (PDB code 5UC0). Crystallographic data and refined model statistics are presented in Table S1. Diffraction images have been uploaded to the SBGrid data server (Data DOI: 10.15785/SBGRID/444).

### Protein sequence alignment and structural homology

Amino acid sequences were aligned using the M-COFFEE Multiple Sequence Alignment Server (96) and shaded using BoxShade. Figures of the structures, structural alignments, electrostatic potential representations and r.m.s.d. calculations were performed using PyMOL (PyMOL Molecular Graphics System, version 1.7.4; Schrödinger, LLC). Surface hydrophobicity was evaluated using the YRB python script (97). The XtalPred server (98) and Dali server (99) were used to identify proteins with the highest structural and sequence homology.

### Size exclusion chromatography

A DNA fragment corresponding to *eipA* lacking the signal peptide (residues 38 - 198) was first PCR amplified. The primers used are listed in Table S6. The resulting PCR product was digested with BamHI / XhoI restriction enzymes (New England Biolabs) and ligated (T4 DNA ligase, New England Biolabs) into similarly digested pET28a plasmid. The ligation was then transformed into *E. coli* Top10 strain. After plating on LB agar plates + 50  $\mu\text{g ml}^{-1}$  kanamycin, the resulting clones were sequence verified and transformed into the protein overexpression *E. coli* Rosetta(DE3) *plysS* strain (see Table S7 for strain information). For overexpression of His-tagged EipA, a 100-ml overnight Luria broth (LB; Fisher) culture (+ 50  $\mu\text{g ml}^{-1}$  kanamycin) was inoculated with the protein expression strain and used to start a 1-liter LB flask (+ 50  $\mu\text{g ml}^{-1}$  kanamycin) culture. Protein overexpression was induced at an  $\text{OD}_{600}$  ~0.8 (37°C, 220 rpm) by adding 1 mM IPTG. After 5-hour induction, cells were harvested by centrifugation at 11,000 x *g* for 20 min at 4°C. Cell pellets were resuspended in 25 ml of BugBuster Master Mix (Millipore - Novagen) and incubated for 20 minutes on ice. The resulting cell lysate was clarified by centrifugation at 39,000 x *g* for 20 min at 4°C. Purification of the His-tagged protein was performed using nickel affinity chromatography (nitrilotriacetic acid [NTA] resin; GE Healthcare). After binding of the clarified lysate samples to the column, two washing steps were performed, using Tris-NaCl buffers (10 mM Tris, pH 7.4, 150 mM NaCl) containing 10 mM and 75 mM imidazole, followed by elution with Tris-NaCl buffer containing 500 mM imidazole. The protein purity of the different fractions was assessed by 14% SDS-PAGE and staining with Coomassie blue. Pure fractions were pooled and dialyzed against Tris-NaCl buffer (10 mM Tris pH 8, 150 mM NaCl, 1 mM EDTA). EipA oligomeric state was then analyzed by size exclusion chromatography. Using a centrifugal filter unit (3-kDa molecular mass cutoff; Amicon-Millipore), a concentrated protein sample (500  $\mu\text{l}$  at 5  $\text{mg ml}^{-1}$ ) was injected onto a GE Healthcare Superdex 200 10/300 GL column (flow rate: 0.5 ml/min). Elution profile was measured at 280 nm and fractions of 500  $\mu\text{l}$  were collected during the run; the dialyzing buffer as that described above was used for all runs. Protein standards (blue dextran: 2,000 kDa, aldolase: 157 kDa, conalbumin: 76 kDa, and ovalbumin: 43 kDa) were also injected into the column, and the corresponding calibration curve was used for molecular size estimation of the purified EipA.

### **Bacterial two-hybrid protein interaction assay**

To assay EipA self-interaction, we used a bacterial two-hybrid system (100). *eipA* DNA fragments were cloned into pUT18 and pUT18C vector (digested with BamHI - EcoRI), which generated a C-terminal or N-terminal fusions to the T18 fragment of adenylate cyclase. *EipA* was also cloned into the pKT25 vector, which generated an N-terminal fusion to the T25 fragment of adenylate cyclase. Primers used for PCRs are listed in Table S6 in the supplemental material; all plasmids were sequence confirmed. The different pUT18, pUT18C and pKT25 combinations were then co-transformed into chemically competent *E. coli* reporter strain BTH101 and plated on LB agar supplemented with ampicillin (100  $\mu\text{g ml}^{-1}$ ) and kanamycin (50  $\mu\text{g ml}^{-1}$ ). Control strains transformed with pKT25-Zip + pUT18c-Zip (positive control), and pKT25 + pUT18C (negative control), were also used. For each combination, a 3 ml LB culture tube containing the right antibiotics was inoculated with a single colony and grown overnight at 30°C. The next day, 5  $\mu\text{l}$  of each culture was spotted on an LB agar plate supplemented with ampicillin (100  $\mu\text{g ml}^{-1}$ ), kanamycin (50  $\mu\text{g ml}^{-1}$ ), and 5-bromo-4-chloro-3-indolyl- $\beta$ -D-galactopyranoside (X-Gal, 40  $\mu\text{g ml}^{-1}$ ) and incubated at 30°C overnight. The next morning, positive interactions were confirmed by the blue color change of the spotted cultures.

### ***Brucella* EipA overexpression strains**



To ectopically express the different versions of EipA (wild-type, and EipA-PhoA<sub>EC</sub> fusion with or without the signal peptide) in *B. ovis*, the pSRKkm (Kan<sup>R</sup>) IPTG inducible plasmid was used (101). An overlapping PCR strategy was used to stitch the *eipA* fragment (with or without the sequence corresponding to the signal peptide) to *E. coli* alkaline phosphatase *phoA* (lacking its signal peptide) (primers are listed in Table S6). A Gibson-assembly (New England Biolabs) cloning strategy was then used to insert the different DNA fragments in the linearized pSRK plasmid. After sequencing, the different plasmids were introduced in *B. ovis* by overnight mating with *E. coli* WM3064 in presence of 300  $\mu$ M of diaminopimelic acid (DAP) and plated on SBA plates supplemented with kanamycin. See Table S7 for strain information.

### Alkaline phosphatase assay

To determine the cellular localization of EipA, we used a *B. ovis* strain transformed with the pSRK plasmid carrying *eipA* C-terminally fused to *E. coli phoA* (see Table S7). Two versions of this plasmid were made: one carrying the full-length *eipA*, which expressed the protein with its signal peptide, and one carrying a short version of *eipA*, which expressed the protein lacking the signal peptide. These two strains were grown overnight in 5 ml of *Brucella* broth supplemented with kanamycin (50  $\mu$ g ml<sup>-1</sup>) and with or without 1 mM IPTG, allowing overexpression of the different protein fusions. The next day, the ODs (600 nm) were adjusted to  $\sim$ 1.8 and 100  $\mu$ l of each sample was transferred in a 96-well plate containing some 5-Bromo-4-chloro-3-indolyl phosphate (BCIP, final concentration 200  $\mu$ M). The same experiment was performed with spent medium supernatants. For each culture condition, 500  $\mu$ l were centrifuged for 2 min at 14000 rpm and 100  $\mu$ l of the supernatants were transferred in a 96-well plate with BCIP. After 2 hours incubation at 37°C / 5% CO<sub>2</sub>, the color change was visually assessed and pictures were taken. This experiment was conducted twice with two different clones each time.

### *B. ovis eipA* depletion strain assays

A *B. ovis*  $\Delta eipA$  strain carrying a pSRK-*eipA* (IPTG inducible) plasmid was used to evaluate the effect of depleting expression of this gene. Two other *B. ovis* wild-type strains, respectively carrying the empty pSRK vector or pSRK-*eipA*, were used as controls. 5 ml *Brucella* broth culture tubes were inoculated and grown overnight at 37°C with or without 1 mM IPTG. The next day, the optical densities (OD<sub>600</sub>) of the different cultures were adjusted to 0.15 ( $\sim$  1 x 10<sup>9</sup> CFU ml<sup>-1</sup>) in *Brucella* broth and serially diluted in a 96-well plate. 5  $\mu$ l of each dilution was then spotted on a SBA plate (kanamycin 50  $\mu$ g ml<sup>-1</sup>) supplemented (or not supplemented) with 1 mM IPTG. After three days of growth at 37°C / 5% CO<sub>2</sub>, the growth amplitudes were compared between the different strains.

Growth experiments in liquid were also performed with these strains. Overnight cultures were used to inoculate 5 ml of *Brucella* broth (+ kanamycin 50  $\mu$ g ml<sup>-1</sup>) at a starting OD<sub>600</sub> of 0.05. These cultures were incubated at 37°C / 5% CO<sub>2</sub>. For the first 12 hours, ODs were measured every 3 hours; a final OD was also taken after 24 hours of growth. Curve fit and doubling time calculations were performed using Prism 6 GraphPad software. Two different clones were used per strain and liquid growth measurements were performed in duplicate for each clone.

Phase-contrast images of the cells were collected using a Leica DM 5000B microscope with an HCX PL APO 63x/1.4 N.A. Ph3 objective. Images were acquired with a mounted Orca-ER digital camera (Hamamatsu) controlled by the Image-Pro software suite (Media Cybernetics). To prepare the different samples, colonies from SBA plates plus or minus 1 mM IPTG were resuspended in 1 ml PBS supplemented with 4% formaldehyde.

## **Acknowledgments**

We thank the members of the Crosson laboratory for helpful discussions. The authors wish to thank members of the SBC at Argonne National Laboratory for their help with data collection at the 19-ID beamline. This work was supported by National Institutes of Health Grants U19AI107792 and R01AI107159 to S.C.

## **Author contributions**

JH, JWW and SC contributed to the design and conceptualization of the study; JH, JWW, AF, LMV, DMC, JXC, EU, AB, YK, GB and SC performed the experiments, acquired and analyzed the data; JH, AF and SC interpreted the data; JH and SC wrote the original draft of the manuscript.

## References

1. Gorvel JP, Moreno E. 2002. *Brucella* intracellular life: from invasion to intracellular replication. *Vet Microbiol* 90:281-97.
2. Gorvel JP. 2008. *Brucella*: a Mr "Hide" converted into Dr Jekyll. *Microbes Infect* 10:1010-3.
3. Celli J. 2006. Surviving inside a macrophage: the many ways of *Brucella*. *Res Microbiol* 157:93-8.
4. Atluri VL, Xavier MN, de Jong MF, den Hartigh AB, Tsolis RM. 2011. Interactions of the human pathogenic *Brucella* species with their hosts. *Annu Rev Microbiol* 65:523-41.
5. Batut J, Andersson SG, O'Callaghan D. 2004. The evolution of chronic infection strategies in the alpha-proteobacteria. *Nat Rev Microbiol* 2:933-45.
6. Byndloss MX, Tsolis RM. 2016. *Brucella* spp. virulence factors and immunity. *Annu Rev Anim Biosci* 4:111-27.
7. de Figueiredo P, Ficht TA, Rice-Ficht A, Rossetti CA, Adams LG. 2015. Pathogenesis and immunobiology of brucellosis: review of *Brucella*-host interactions. *Am J Pathol* 185:1505-17.
8. Pappas G, Papadimitriou P, Akritidis N, Christou L, Tsiianos EV. 2006. The new global map of human brucellosis. *Lancet Infect Dis* 6:91-9.
9. Lapaque N, Moriyon I, Moreno E, Gorvel JP. 2005. *Brucella* lipopolysaccharide acts as a virulence factor. *Curr Opin Microbiol* 8:60-6.
10. Cardoso PG, Macedo GC, Azevedo V, Oliveira SC. 2006. *Brucella* spp noncanonical LPS: structure, biosynthesis, and interaction with host immune system. *Microb Cell Fact* 5:13.
11. Conde-Alvarez R, Arce-Gorvel V, Iriarte M, Mancek-Keber M, Barquero-Calvo E, Palacios-Chaves L, Chacon-Diaz C, Chaves-Olarte E, Martirosyan A, von Bargen K, Grillo MJ, Jerala R, Brandenburg K, Lobet E, Bengoechea JA, Moreno E, Moriyon I, Gorvel JP. 2012. The lipopolysaccharide core of *Brucella abortus* acts as a shield against innate immunity recognition. *PLoS Pathog* 8:e1002675.
12. Smith JA. 2018. *Brucella* lipopolysaccharide and pathogenicity: the core of the matter. *Virulence* 9:379-382.
13. O'Callaghan D, Cazevielle C, Allardet-Servent A, Boschiroli ML, Bourg G, Foulongne V, Frutos P, Kulakov Y, Ramuz M. 1999. A homologue of the *Agrobacterium tumefaciens* VirB and *Bordetella pertussis* Ptl type IV secretion systems is essential for intracellular survival of *Brucella suis*. *Mol Microbiol* 33:1210-20.
14. Delrue RM, Martinez-Lorenzo M, Lestrade P, Danese I, Bielarz V, Mertens P, De Bolle X, Tibor A, Gorvel JP, Letesson JJ. 2001. Identification of *Brucella* spp. genes involved in intracellular trafficking. *Cell Microbiol* 3:487-97.
15. den Hartigh AB, Rolan HG, de Jong MF, Tsolis RM. 2008. VirB3 to VirB6 and VirB8 to VirB11, but not VirB7, are essential for mediating persistence of *Brucella* in the reticuloendothelial system. *J Bacteriol* 190:4427-36.
16. de Bary M, Jamet A, Filopon D, Nicolas C, Laloux G, Rual JF, Muller A, Twizere JC, Nkengfac B, Vandenhoute J, Hill DE, Salcedo SP, Gorvel JP, Letesson JJ, De Bolle X. 2011. Identification of a *Brucella* spp. secreted effector specifically interacting with human small GTPase Rab2. *Cell Microbiol* 13:1044-58.
17. Lavigne JP, Patey G, Sangari FJ, Bourg G, Ramuz M, O'Callaghan D, Michaux-Charachon S. 2005. Identification of a new virulence factor, BvfA, in *Brucella suis*. *Infect Immun* 73:5524-9.
18. Spera JM, Herrmann CK, Roset MS, Comerci DJ, Ugalde JE. 2013. A *Brucella* virulence factor targets macrophages to trigger B-cell proliferation. *J Biol Chem* 288:20208-16.
19. Chirhart-Gilleland RL, Kovach ME, Elzer PH, Jennings SR, Roop RM, 2nd. 1998. Identification and characterization of a 14-kilodalton *Brucella abortus* protein reactive with antibodies from naturally and experimentally infected hosts and T lymphocytes from experimentally infected BALB/c mice. *Infect Immun* 66:4000-3.
20. Kainth P, Gupta RS. 2005. Signature proteins that are distinctive of alpha proteobacteria. *BMC Genomics* 6:94.
21. Laub MT, Chen SL, Shapiro L, McAdams HH. 2002. Genes directly controlled by CtrA, a master regulator of the *Caulobacter* cell cycle. *Proc Natl Acad Sci U S A* 99:4632-7.
22. McGrath PT, Iniesta AA, Ryan KR, Shapiro L, McAdams HH. 2006. A dynamically localized protease complex and a polar specificity factor control a cell cycle master regulator. *Cell* 124:535-47.
23. De Nisco NJ, Abo RP, Wu CM, Penterman J, Walker GC. 2014. Global analysis of cell cycle gene expression of the legume symbiont *Sinorhizobium meliloti*. *Proc Natl Acad Sci U S A* 111:3217-24.
24. Schluter JP, Reinkensmeier J, Barnett MJ, Lang C, Krol E, Giegerich R, Long SR, Becker A. 2013. Global mapping of transcription start sites and promoter motifs in the symbiotic alpha-proteobacterium *Sinorhizobium meliloti* 1021. *BMC Genomics* 14:156.

25. Pini F, De Nisco NJ, Ferri L, Penterman J, Fioravanti A, Brilli M, Mengoni A, Bazzicalupo M, Viollier PH, Walker GC, Biondi EG. 2015. Cell cycle control by the master regulator CtrA in *Sinorhizobium meliloti*. *PLoS Genet* 11:e1005232.
26. Perry BJ, Akter MS, Yost CK. 2016. The use of transposon insertion sequencing to interrogate the core functional genome of the legume symbiont *Rhizobium leguminosarum*. *Front Microbiol* 7:1873.
27. Price MN, Wetmore KM, Waters RJ, Callaghan M, Ray J, Liu H, Kuehl JV, Melnyk RA, Lamson JS, Suh Y, Carlson HK, Esquivel Z, Sadeeshkumar H, Chakraborty R, Zane GM, Rubin BE, Wall JD, Visel A, Bristow J, Blow MJ, Arkin AP, Deutschbauer AM. 2018. Mutant phenotypes for thousands of bacterial genes of unknown function. *Nature* 557:503-509.
28. Tsolis RM, Seshadri R, Santos RL, Sangari FJ, Lobo JM, de Jong MF, Ren Q, Myers G, Brinkac LM, Nelson WC, Deboy RT, Angiuoli S, Khouri H, Dimitrov G, Robinson JR, Mulligan S, Walker RL, Elzer PE, Hassan KA, Paulsen IT. 2009. Genome degradation in *Brucella ovis* corresponds with narrowing of its host range and tissue tropism. *PLoS One* 4:e5519.
29. Bateman A, Coggill P, Finn RD. 2010. DUFs: families in search of function. *Acta Crystallogr Sect F Struct Biol Cryst Commun* 66:1148-52.
30. Finn RD, Coggill P, Eberhardt RY, Eddy SR, Mistry J, Mitchell AL, Potter SC, Punta M, Qureshi M, Sangrador-Vegas A, Salazar GA, Tate J, Bateman A. 2016. The Pfam protein families database: towards a more sustainable future. *Nucleic Acids Res* 44:D279-85.
31. Willett JW, Herrou J, Briegel A, Rotskoff G, Crosson S. 2015. Structural asymmetry in a conserved signaling system that regulates division, replication, and virulence of an intracellular pathogen. *Proc Natl Acad Sci U S A* 112:E3709-18.
32. Brilli M, Fondi M, Fani R, Mengoni A, Ferri L, Bazzicalupo M, Biondi EG. 2010. The diversity and evolution of cell cycle regulation in alpha-proteobacteria: a comparative genomic analysis. *BMC Syst Biol* 4:52.
33. Poncin K, Gillet S, De Bolle X. 2018. Learning from the master: targets and functions of the CtrA response regulator in *Brucella abortus* and other alpha-proteobacteria. *FEMS Microbiol Rev* 42:500-513.
34. Panis G, Murray SR, Viollier PH. 2015. Versatility of global transcriptional regulators in alpha-proteobacteria: from essential cell cycle control to ancillary functions. *FEMS Microbiol Rev* 39:120-33.
35. Francis N, Poncin K, Fioravanti A, Vassen V, Willemart K, Ong TA, Rappez L, Letesson JJ, Biondi EG, De Bolle X. 2017. CtrA controls cell division and outer membrane composition of the pathogen *Brucella abortus*. *Mol Microbiol* 103:780-797.
36. Spencer W, Siam R, Ouimet MC, Bastedo DP, Marczyński GT. 2009. CtrA, a global response regulator, uses a distinct second category of weak DNA binding sites for cell cycle transcription control in *Caulobacter crescentus*. *J Bacteriol* 191:5458-70.
37. Barnett MJ, Hung DY, Reisenauer A, Shapiro L, Long SR. 2001. A homolog of the CtrA cell cycle regulator is present and essential in *Sinorhizobium meliloti*. *J Bacteriol* 183:3204-10.
38. Smith SC, Joshi KK, Zik JJ, Trinh K, Kamajaya A, Chien P, Ryan KR. 2014. Cell cycle-dependent adaptor complex for ClpXP-mediated proteolysis directly integrates phosphorylation and second messenger signals. *Proc Natl Acad Sci U S A* 111:14229-34.
39. Baldwin CL, Parent M. 2002. Fundamentals of host immune response against *Brucella abortus*: what the mouse model has revealed about control of infection. *Vet Microbiol* 90:367-82.
40. Oliveira SC, de Almeida LA, Carvalho NB, Oliveira FS, Lacerda TL. 2012. Update on the role of innate immune receptors during *Brucella abortus* infection. *Vet Immunol Immunopathol* 148:129-35.
41. Pei J, Ding X, Fan Y, Rice-Ficht A, Ficht TA. 2012. Toll-like receptors are critical for clearance of *Brucella* and play different roles in development of adaptive immunity following aerosol challenge in mice. *Front Cell Infect Microbiol* 2:115.
42. Weiss DS, Takeda K, Akira S, Zychlinsky A, Moreno E. 2005. MyD88, but not toll-like receptors 4 and 2, is required for efficient clearance of *Brucella abortus*. *Infect Immun* 73:5137-43.
43. Bochner BR. 2009. Global phenotypic characterization of bacteria. *FEMS Microbiol Rev* 33:191-205.
44. Wassmann CS, Lund LC, Thorsing M, Lauritzen SP, Kolmos HJ, Kallipolitis BH, Klitgaard JK. 2018. Molecular mechanisms of thioridazine resistance in *Staphylococcus aureus*. *PLoS One* 13:e0201767.
45. Bonde M, Hojland DH, Kolmos HJ, Kallipolitis BH, Klitgaard JK. 2011. Thioridazine affects transcription of genes involved in cell wall biosynthesis in methicillin-resistant *Staphylococcus aureus*. *FEMS Microbiol Lett* 318:168-76.
46. Miller EL. 2002. The penicillins: a review and update. *J Midwifery Womens Health* 47:426-34.
47. Scariot FJ, Jahn L, Delamare APL, Echeverrigaray S. 2017. Necrotic and apoptotic cell death induced by Captan on *Saccharomyces cerevisiae*. *World J Microbiol Biotechnol* 33:159.
48. Ohsuka S, Ohta M, Masuda K, Arakawa Y, Kaneda T, Kato N. 1994. Lidocaine hydrochloride and acetylsalicylate kill bacteria by disrupting the bacterial membrane potential in different ways. *Microbiol Immunol* 38:429-34.



49. Alakomi HL, Skytta E, Saarela M, Mattila-Sandholm T, Latva-Kala K, Helander IM. 2000. Lactic acid permeabilizes gram-negative bacteria by disrupting the outer membrane. *Appl Environ Microbiol* 66:2001-5.
50. McDonnell G, Russell AD. 1999. Antiseptics and disinfectants: activity, action, and resistance. *Clin Microbiol Rev* 12:147-79.
51. Duxbury CL, Thompson JE. 1987. Pentachlorophenol alters the molecular organization of membranes in mammalian cells. *Arch Environ Contam Toxicol* 16:367-73.
52. Oetken C, von Willebrand M, Autero M, Ruutu T, Andersson LC, Mustelin T. 1992. Phenylarsine oxide augments tyrosine phosphorylation in hematopoietic cells. *Eur J Haematol* 49:208-14.
53. Standish AJ, Morona R. 2014. The role of bacterial protein tyrosine phosphatases in the regulation of the biosynthesis of secreted polysaccharides. *Antioxid Redox Signal* 20:2274-89.
54. Heneberg P. 2012. Finding the smoking gun: protein tyrosine phosphatases as tools and targets of unicellular microorganisms and viruses. *Curr Med Chem* 19:1530-66.
55. Vaara M. 1992. Agents that increase the permeability of the outer membrane. *Microbiol Rev* 56:395-411.
56. Chopra I, Roberts M. 2001. Tetracycline antibiotics: mode of action, applications, molecular biology, and epidemiology of bacterial resistance. *Microbiol Mol Biol Rev* 65:232-60 ; second page, table of contents.
57. Wood JM. 2015. Bacterial responses to osmotic challenges. *J Gen Physiol* 145:381-8.
58. Gonzalez D, Grillo MJ, De Miguel MJ, Ali T, Arce-Gorvel V, Delrue RM, Conde-Alvarez R, Munoz P, Lopez-Goni I, Iriarte M, Marin CM, Weintraub A, Widmalm G, Zygmunt M, Letesson JJ, Gorvel JP, Blasco JM, Moriyon I. 2008. Brucellosis vaccines: assessment of *Brucella melitensis* lipopolysaccharide rough mutants defective in core and O-polysaccharide synthesis and export. *PLoS One* 3:e2760.
59. Ugalde JE, Czibener C, Feldman MF, Ugalde RA. 2000. Identification and characterization of the *Brucella abortus* phosphoglucosyltransferase gene: role of lipopolysaccharide in virulence and intracellular multiplication. *Infect Immun* 68:5716-23.
60. Zhang M, Han X, Liu H, Tian M, Ding C, Song J, Sun X, Liu Z, Yu S. 2013. Inactivation of the ABC transporter ATPase gene in *Brucella abortus* strain 2308 attenuated the virulence of the bacteria. *Vet Microbiol* 164:322-9.
61. Tian M, Qu J, Han X, Ding C, Wang S, Peng D, Yu S. 2014. Mechanism of Asp24 upregulation in *Brucella abortus* rough mutant with a disrupted O-antigen export system and effect of Asp24 in bacterial intracellular survival. *Infect Immun* 82:2840-50.
62. Mancilla M, Marin CM, Blasco JM, Zarraga AM, Lopez-Goni I, Moriyon I. 2012. Spontaneous excision of the O-polysaccharide wbkA glycosyltransferase gene is a cause of dissociation of smooth to rough *Brucella* colonies. *J Bacteriol* 194:1860-7.
63. Cloeckert A, Grayon M, Verger JM, Letesson JJ, Godfroid F. 2000. Conservation of seven genes involved in the biosynthesis of the lipopolysaccharide O-side chain in *Brucella* spp. *Res Microbiol* 151:209-16.
64. Dabral N, Jain-Gupta N, Seleem MN, Sriranganathan N, Vemulapalli R. 2015. Overexpression of *Brucella* putative glycosyltransferase WbkA in *B. abortus* RB51 leads to production of exopolysaccharide. *Front Cell Infect Microbiol* 5:54.
65. Monreal D, Grillo MJ, Gonzalez D, Marin CM, De Miguel MJ, Lopez-Goni I, Blasco JM, Cloeckert A, Moriyon I. 2003. Characterization of *Brucella abortus* O-polysaccharide and core lipopolysaccharide mutants and demonstration that a complete core is required for rough vaccines to be efficient against *Brucella abortus* and *Brucella ovis* in the mouse model. *Infect Immun* 71:3261-71.
66. Guzman-Verri C, Manterola L, Sola-Landa A, Parra A, Cloeckert A, Garin J, Gorvel JP, Moriyon I, Moreno E, Lopez-Goni I. 2002. The two-component system BvrR/BvrS essential for *Brucella abortus* virulence regulates the expression of outer membrane proteins with counterparts in members of the *Rhizobiaceae*. *Proc Natl Acad Sci U S A* 99:12375-80.
67. Lamontagne J, Butler H, Chaves-Olarte E, Hunter J, Schirm M, Paquet C, Tian M, Kearney P, Hamaidi L, Chelsky D, Moriyon I, Moreno E, Paramithiotis E. 2007. Extensive cell envelope modulation is associated with virulence in *Brucella abortus*. *J Proteome Res* 6:1519-29.
68. Manterola L, Moriyon I, Moreno E, Sola-Landa A, Weiss DS, Koch MH, Howe J, Brandenburg K, Lopez-Goni I. 2005. The lipopolysaccharide of *Brucella abortus* BvrS/BvrR mutants contains lipid A modifications and has higher affinity for bactericidal cationic peptides. *J Bacteriol* 187:5631-9.
69. Mancilla M. 2015. Smooth to rough dissociation in *Brucella*: the missing link to virulence. *Front Cell Infect Microbiol* 5:98.
70. Soler-Llorens P, Gil-Ramirez Y, Zabalza-Barangua A, Iriarte M, Conde-Alvarez R, Zuniga-Ripa A, San Roman B, Zygmunt MS, Vizcaino N, Cloeckert A, Grillo MJ, Moriyon I, Lopez-Goni I. 2014. Mutants in the lipopolysaccharide of *Brucella ovis* are attenuated and protect against *B. ovis* infection in mice. *Vet Res* 45:72.

71. Zygmunt MS, Blasco JM, Letesson JJ, Cloeckert A, Moriyon I. 2009. DNA polymorphism analysis of *Brucella* lipopolysaccharide genes reveals marked differences in O-polysaccharide biosynthetic genes between smooth and rough *Brucella* species and novel species-specific markers. *BMC Microbiol* 9:92.
72. Palmer DA, Douglas JT. 1989. Analysis of *Brucella* lipopolysaccharide with specific and cross-reacting monoclonal antibodies. *J Clin Microbiol* 27:2331-2337.
73. Holm L, Laakso LM. 2016. Dali server update. *Nucleic Acids Res* 44:W351-5.
74. Okoko T, Blagova EV, Whittingham JL, Dover LG, Wilkinson AJ. 2015. Structural characterisation of the virulence-associated protein VapG from the horse pathogen *Rhodococcus equi*. *Vet Microbiol* 179:42-52.
75. Nielsen H. 2017. Predicting Secretory Proteins with SignalP. *Methods Mol Biol* 1611:59-73.
76. Marrichi M, Camacho L, Russell DG, DeLisa MP. 2008. Genetic toggling of alkaline phosphatase folding reveals signal peptides for all major modes of transport across the inner membrane of bacteria. *J Biol Chem* 283:35223-35.
77. De Bolle X, Crosson S, Matroule JY, Letesson JJ. 2015. *Brucella abortus* cell cycle and infection are coordinated. *Trends Microbiol* 23:812-821.
78. Zhou B, Schrader JM, Kalogeraki VS, Abeliuk E, Dinh CB, Pham JQ, Cui ZZ, Dill DL, McAdams HH, Shapiro L. 2015. The global regulatory architecture of transcription during the *Caulobacter* cell cycle. *PLoS Genet* 11:e1004831.
79. Schrader JM, Li GW, Childers WS, Perez AM, Weissman JS, Shapiro L, McAdams HH. 2016. Dynamic translation regulation in *Caulobacter* cell cycle control. *Proc Natl Acad Sci U S A* 113:E6859-E6867.
80. Fang G, Passalacqua KD, Hocking J, Llopis PM, Gerstein M, Bergman NH, Jacobs-Wagner C. 2013. Transcriptomic and phylogenetic analysis of a bacterial cell cycle reveals strong associations between gene co-expression and evolution. *BMC Genomics* 14:450.
81. McGrath PT, Lee H, Zhang L, Iniesta AA, Hottes AK, Tan MH, Hillson NJ, Hu P, Shapiro L, McAdams HH. 2007. High-throughput identification of transcription start sites, conserved promoter motifs and predicted regulons. *Nat Biotechnol* 25:584-92.
82. Hottes AK, Shapiro L, McAdams HH. 2005. DnaA coordinates replication initiation and cell cycle transcription in *Caulobacter crescentus*. *Mol Microbiol* 58:1340-53.
83. Laub MT, McAdams HH, Feldblyum T, Fraser CM, Shapiro L. 2000. Global analysis of the genetic network controlling a bacterial cell cycle. *Science* 290:2144-8.
84. Cabeen MT, Murolo MA, Briegel A, Bui NK, Vollmer W, Ausmees N, Jensen GJ, Jacobs-Wagner C. 2010. Mutations in the lipopolysaccharide biosynthesis pathway interfere with crescentin-mediated cell curvature in *Caulobacter crescentus*. *J Bacteriol* 192:3368-78.
85. Santa Maria JP, Jr., Sadaka A, Moussa SH, Brown S, Zhang YJ, Rubin EJ, Gilmore MS, Walker S. 2014. Compound-gene interaction mapping reveals distinct roles for *Staphylococcus aureus* teichoic acids. *Proc Natl Acad Sci U S A* 111:12510-5.
86. Kim HS, Caswell CC, Foreman R, Roop RM, 2nd, Crosson S. 2013. The *Brucella abortus* general stress response system regulates chronic mammalian infection and is controlled by phosphorylation and proteolysis. *J Biol Chem* 288:13906-16.
87. Wetmore KM, Price MN, Waters RJ, Lamson JS, He J, Hoover CA, Blow MJ, Bristow J, Butland G, Arkin AP, Deutschbauer A. 2015. Rapid quantification of mutant fitness in diverse bacteria by sequencing randomly bar-coded transposons. *MBio* 6:e00306-15.
88. Aslanidis C, de Jong PJ. 1990. Ligation-independent cloning of PCR products (LIC-PCR). *Nucleic Acids Res* 18:6069-74.
89. Eschenfeldt WH, Lucy S, Millard CS, Joachimiak A, Mark ID. 2009. A family of LIC vectors for high-throughput cloning and purification of proteins. *Methods Mol Biol* 498:105-15.
90. Kim Y, Babnigg G, Jedrzejczak R, Eschenfeldt WH, Li H, Maltseva N, Hatzos-Skintges C, Gu M, Makowska-Grzyska M, Wu R, An H, Chhor G, Joachimiak A. 2011. High-throughput protein purification and quality assessment for crystallization. *Methods* 55:12-28.
91. Minor W, Cymborowski M, Otwinowski Z, Chruszcz M. 2006. HKL-3000: the integration of data reduction and structure solution--from diffraction images to an initial model in minutes. *Acta Crystallogr D Biol Crystallogr* 62:859-66.
92. Emsley P, Cowtan K. 2004. Coot: model-building tools for molecular graphics. *Acta Crystallogr D Biol Crystallogr* 60:2126-32.
93. Adams PD, Grosse-Kunstleve RW, Hung LW, Ioerger TR, McCoy AJ, Moriarty NW, Read RJ, Sacchettini JC, Sauter NK, Terwilliger TC. 2002. PHENIX: building new software for automated crystallographic structure determination. *Acta Crystallogr D Biol Crystallogr* 58:1948-54.
94. Murshudov GN, Vagin AA, Dodson EJ. 1997. Refinement of macromolecular structures by the maximum-likelihood method. *Acta Crystallogr D Biol Crystallogr* 53:240-55.

95. Laskowski RA, MacArthur MW, Moss DS, Thornton JM. 1993. PROCHECK: a program to check the stereochemical quality of protein structures. *J Appl Crystallogr* 26: 283-291.
96. Wallace IM, O'Sullivan O, Higgins DG, Notredame C. 2006. M-Coffee: combining multiple sequence alignment methods with T-Coffee. *Nucleic Acids Res* 34:1692-9.
97. Hagemans D, van Belzen IA, Moran Luengo T, Rudiger SG. 2015. A script to highlight hydrophobicity and charge on protein surfaces. *Front Mol Biosci* 2:56.
98. Slabinski L, Jaroszewski L, Rychlewski L, Wilson IA, Lesley SA, Godzik A. 2007. XtalPred: a web server for prediction of protein crystallizability. *Bioinformatics* 23:3403-5.
99. Holm L, Rosenstrom P. 2010. Dali server: conservation mapping in 3D. *Nucleic Acids Res* 38:W545-9.
100. Battesti A, Bouveret E. 2012. The bacterial two-hybrid system based on adenylate cyclase reconstitution in *Escherichia coli*. *Methods* 58:325-34.
101. Khan SR, Gaines J, Roop RM, 2nd, Farrand SK. 2008. Broad-host-range expression vectors with tightly regulated promoters and their use to examine the influence of TraR and TraM expression on Ti plasmid quorum sensing. *Appl Environ Microbiol* 74:5053-62.

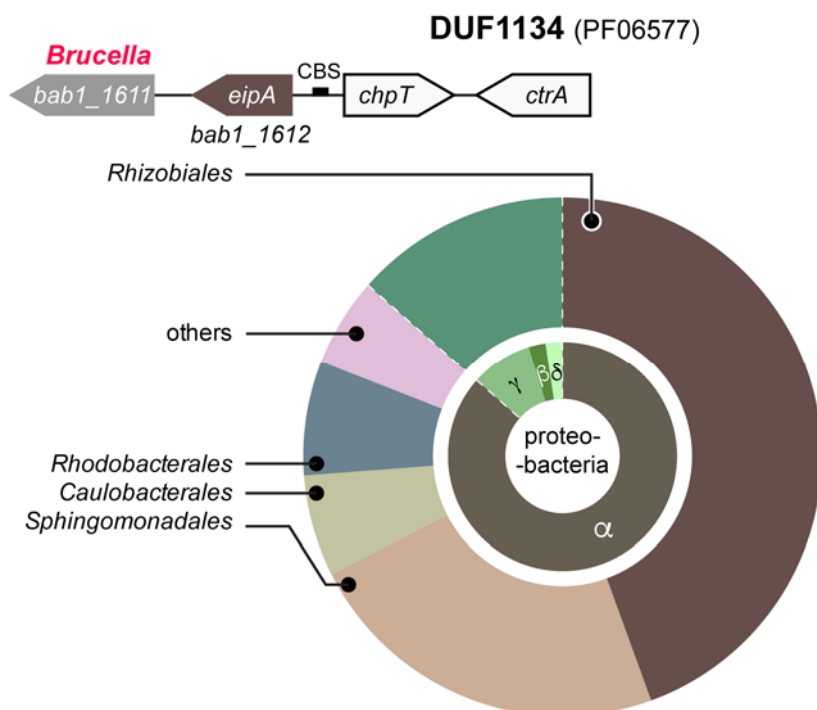

**Figure 1:** DUF1134 distribution across the bacterial kingdom (adapted from Pfam PF06577). Inner circle: DUF1134 is restricted to proteobacteria, and is most common in Alphaproteobacteria. Outer circle: Among Alphaproteobacteria, DUF1134 is most common in *Rhizobiales* (48%, in dark brown), and *Sphingomonadales* (30%, in light brown) and, to a lesser extent, in *Rhodobacterales* (5%, in grey-blue) and in *Caulobacterales* (5%, in light green). There are genera in Alphaproteobacteria in which we could not detect DUF1134 (e.g. *Hyphomonas*) Top: cartoon representation of the genic region surrounding *bab1\_1612* / DUF1134 (i.e. *eipA*; brown) coding. In *Brucella* spp. (*Rhizobiales*), *eipA* is positioned adjacent to the essential phosphotransferase *chpT* (*bab1\_1613*, in white) and the essential transcriptional regulator *ctrA* (*bab1\_1614*, in white). CtrA-binding sites (CBS) are found upstream of *eipA* and *chpT*.



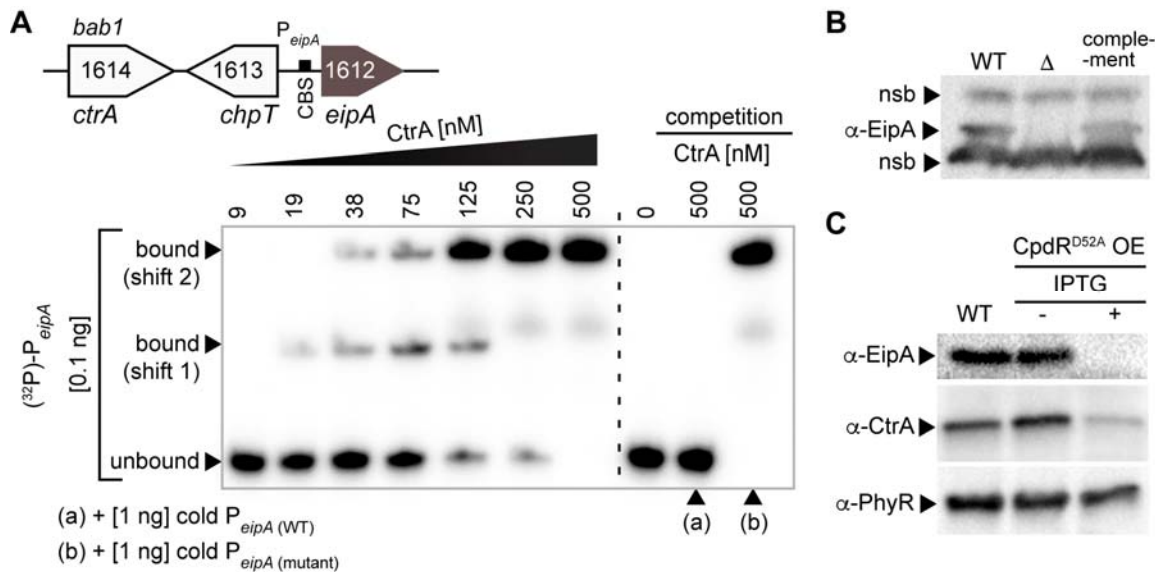

**Figure 2:** The essential cell cycle regulator, CtrA, directly binds the promoter region of *eipA* in *B. abortus* and activates its expression. A) Electrophoretic mobility shift assay (EMSA) with purified CtrA protein and *eipA* promoter region ( $P_{eipA}$ ). Top: cartoon representation of the *eipA* chromosomal locus, with *ctrA* (*bab1\_1614*; white), *chpT* (*bab1\_1613*; white), and the CtrA binding site (CBS, black rectangle) present in *eipA* (in brown) promoter region. Increasing concentrations of CtrA (9 - 500  $\mu$ M) were mixed with 0.1 ng of radiolabelled DNA corresponding to *eipA* promoter (131 bp) (lane 1 to 7). A full shift of the DNA was observed at 500  $\mu$ M CtrA. Lane 8 (from left) shows DNA alone, without CtrA. To test CtrA binding specificity, we competed 0.1 ng of radiolabelled wild-type DNA with 1 ng of unlabelled wild-type DNA (lane 9, (a)), or 1 ng of unlabeled and mutated DNA (lane 10, (b)). This experiment was independently performed four times; a representative gel is presented. B) Specificity of the rabbit anti-EipA polyclonal serum was tested by Western blot using cell lysate from *B. abortus* wild-type (lane 1), *eipA* deletion (lane 2) and *eipA* complementation (lane 3) strains. Non-specific bands (nsb) were used as loading controls. C) EipA protein levels were evaluated in wild-type *B. abortus* (lane 1) or in a strain carrying an inducible *cpdR*<sup>D52A</sup> overexpression plasmid with (lane 3) or without (lane 2) IPTG inducer. Western blots of lysates from these strains were probed with anti-EipA serum (top), anti-CtrA serum (middle), and anti-PhyR serum as a loading control (bottom). This experiment was independently repeated three times; a representative gel is presented.

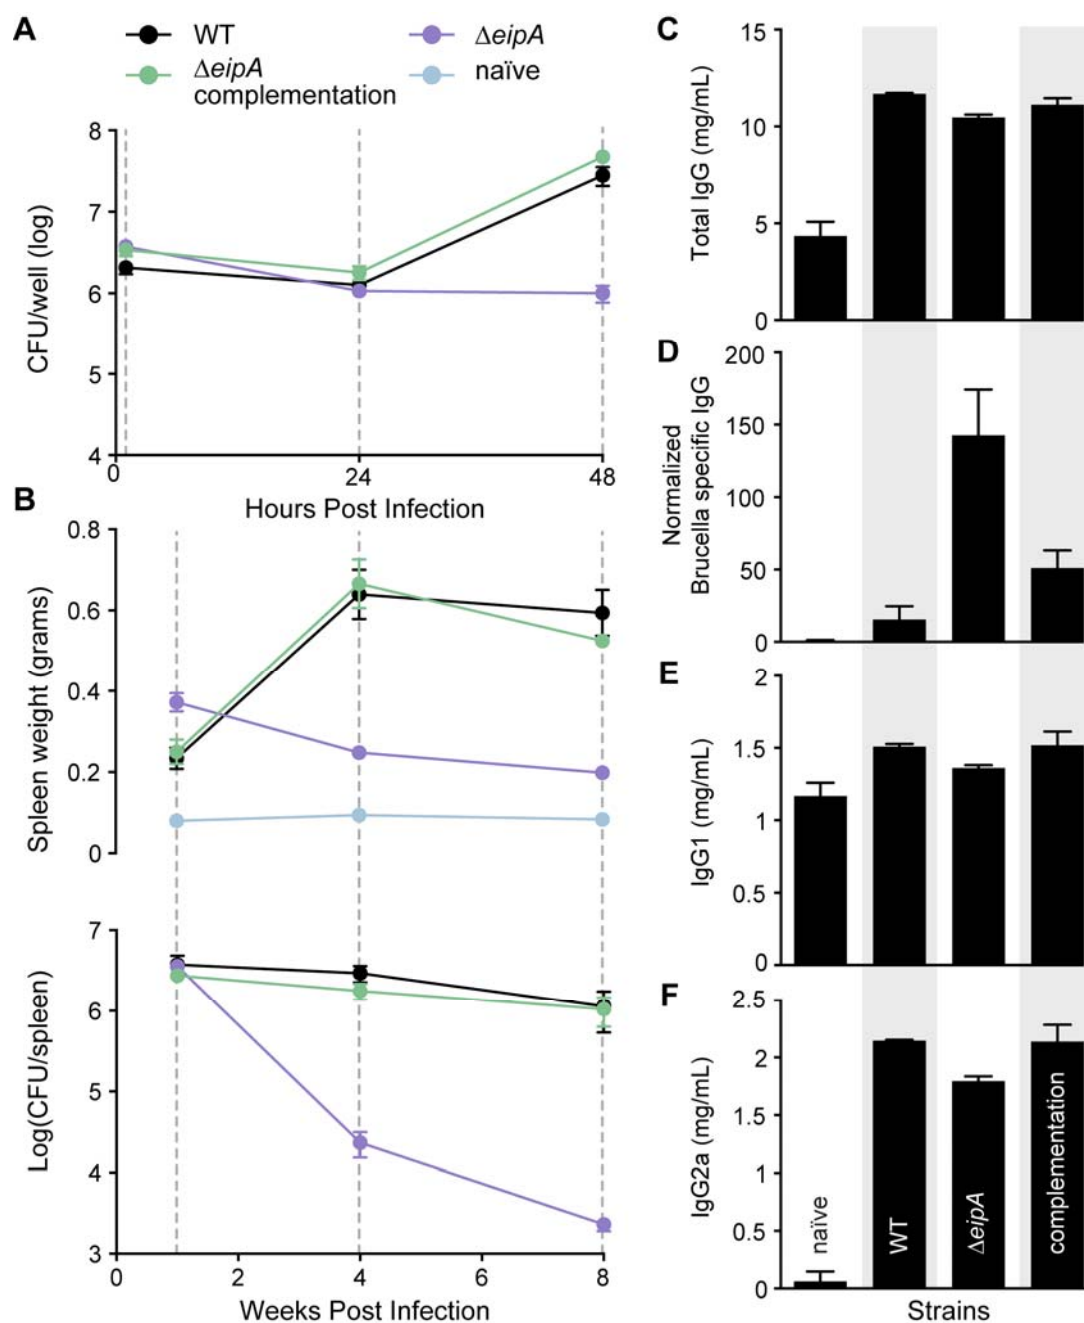

**Figure 3:** *eipA* is a genetic determinant of *B. abortus* virulence. A) *In vitro* macrophage infection assay: infection of THP-1 cells with wild-type *B. abortus* 2308 (black line),  $\Delta eipA$  (purple line) and the *eipA* complementation strain (green line). The number of *B. abortus* CFUs recovered from the THP-1 cells at 1, 24, and 48 hours post infection is plotted. Each data point ( $n = 3$  per strain) is the mean  $\pm$  the standard error of the mean. B) *In vivo* mouse infection assay: Female BALB/c mice were injected intraperitoneally with wild-type,  $\Delta eipA$ , or *eipA* complementation strains. Spleen weights (upper graph) and bacterial burden (lower graph) were measured at 1, 4, and 8 weeks post-infection. Graphs represent data from uninfected, naïve mice (light blue) or mice infected with wild-type (black),  $\Delta eipA$  (purple), or *eipA* complementation (light green) strains. Data presented are the mean  $\pm$  the standard error of the mean;  $n=5$  mice per strain per time point. C-F) Antibody quantification in mouse serum harvested at 8 weeks post-infection from naïve control mice or mice infected with wild-type,  $\Delta eipA$ , or complementation strains. Amounts of total IgG (C), *Brucella*-specific IgG (D), IgG1 (E), and IgG2a (F) were determined by ELISA. Each data point (naïve:  $n = 3$ , WT:  $n = 2$ ,  $\Delta eipA$  and complementation:  $n = 4$ ) is the mean  $\pm$  the standard error of the mean.

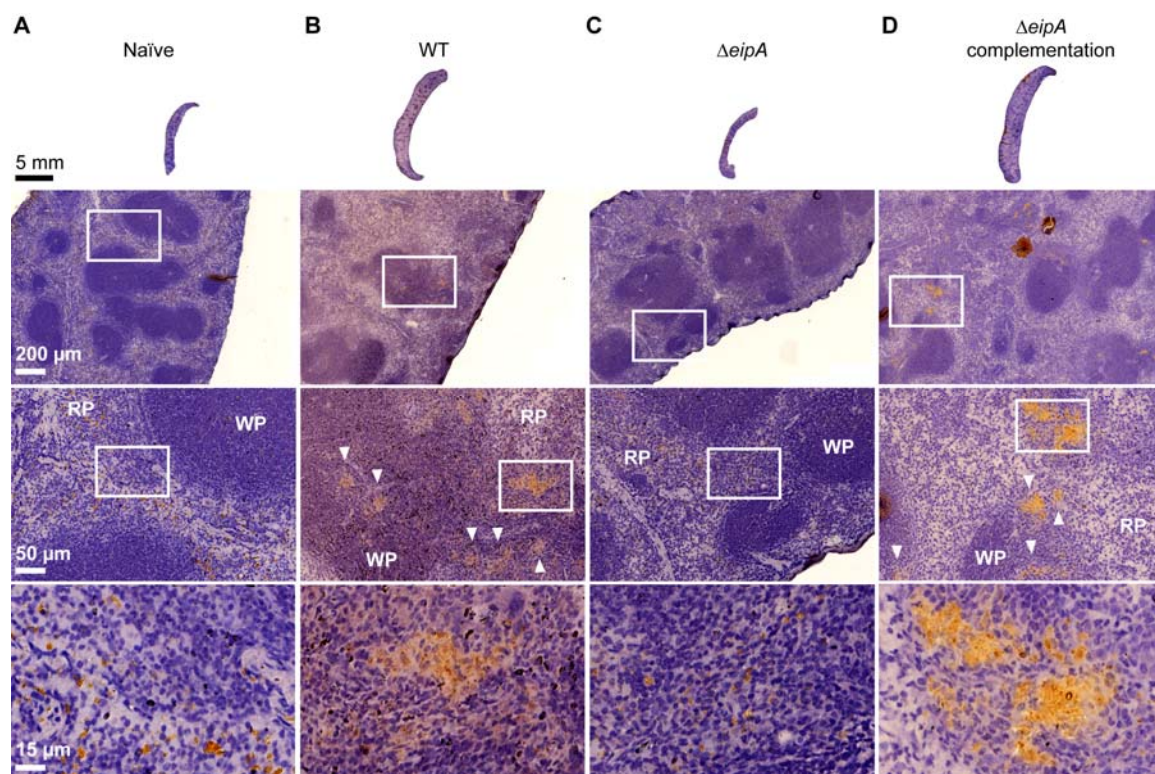

**Figure 4:** Histology of BALB/c mouse spleens eight weeks post infection. Spleens (n=1 per strain) were harvested, fixed, and stained with hematoxylin and eosin. Pictures of uninfected (A), wild-type *B. abortus* infected (B),  $\Delta eipA$  (C), or *eipA* complemented (D) spleens were taken; white boxes represent specific regions enlarged in the images below. *Brucella* antigen was visualized by immunohistochemistry with an anti-*Brucella* antibody (brown regions, highlighted with white arrow heads). WP= white pulp, RP= red pulp.

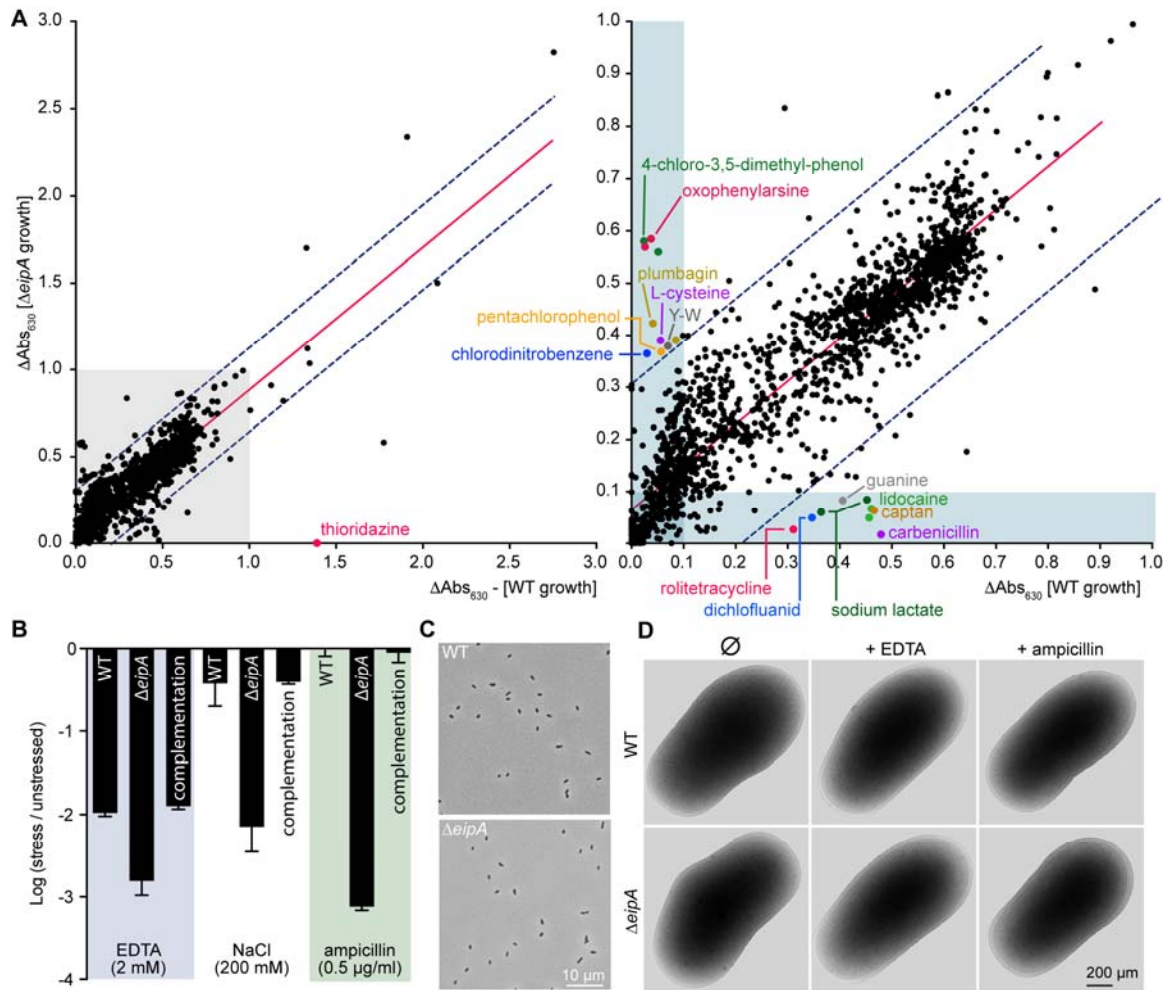

**Figure 5:** Assessing the effect of cell envelope stressors on *B. abortus*  $\Delta eipA$  growth and survival. A) Bacterial phenotype microarray analysis. *Left*: Growth of  $\Delta eipA$  (measured as a function of tetrazolium reduction at 630 nm at T=118 hours) plotted against wild-type growth in 1,920 different metabolic and stress conditions. *Right*: a zoomed view, corresponding to the grey rectangle on the left-hand graph. The red line corresponds to a linear regression; the blue dotted lines show the 99% confidence prediction band. Spots outside this band with  $\text{Abs}_{630}$  greater than 0.1 (light blue rectangles) were considered positive hits. B) Envelope stress survival assays. Serially diluted cultures of *B. abortus* wild-type,  $\Delta eipA$ , and *eipA* complementation strains were spotted on plain TSA plates or TSA plates containing EDTA (2 mM), NaCl (200 mM), or ampicillin (0.5  $\mu\text{g ml}^{-1}$ ). After 3 days of growth at 37°C / 5%  $\text{CO}_2$ , CFUs for each condition were enumerated and plotted. This experiment was repeated four times; each data point is the mean  $\pm$  the standard error of the mean. C) Light micrograph of *B. abortus* wild-type (top) and  $\Delta eipA$  (bottom) liquid cultures grown overnight in Brucella broth. D) CryoEM images of *B. abortus* wild-type and  $\Delta eipA$  cells cultivated in liquid broth that either remained untreated or were treated with 2 mM EDTA or 0.5  $\mu\text{g ml}^{-1}$  ampicillin for 4 hours.



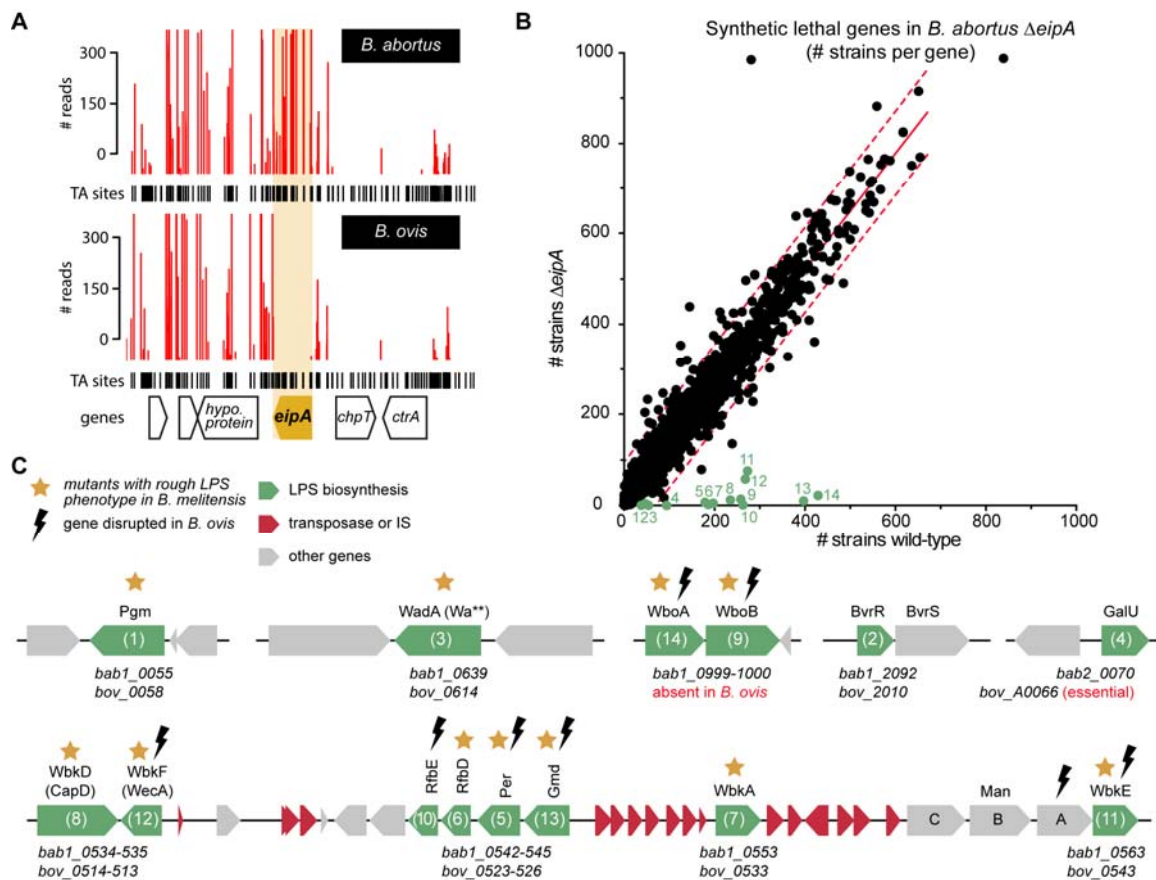

**Figure 6:** *B. abortus eipA* is synthetically lethal with genes involved in LPS O-antigen synthesis; *eipA* is essential in *B. ovis* A) Normalized Tn-himar insertion profile in the *eipA* region of wild-type *B. abortus* (top) and wild-type *B. ovis* (bottom). Insertions in the essential genes *chpT* and *ctrA* are not recovered in either species. Insertions in *eipA* are tolerated and recovered in *B. abortus*, but not in *B. ovis*. B) Identification of *B. abortus* genes that are synthetically lethal with *eipA*. Tn insertion strains per gene (black dots) obtained in *B. abortus*  $\Delta eipA$  Tn-himar library are plotted as a function of strains per gene in the wild-type Tn-himar library. Synthetic lethal genes (i.e. those genes for which we observed significantly fewer insertions in  $\Delta eipA$  than in wild type) are represented as green dots and numbered from 1 to 14; the corresponding genes are described in panel C. C) Cartoon representation of the synthetic lethal genes evident in panel B. Gene names and locus numbers in *B. abortus* and *B. ovis* are reported above and below the diagram, respectively. Mutations present in these genes that have been reported to confer a rough phenotype in *B. melitensis* are marked with a yellow star. Genes disrupted (early stop codon, frame-shift, mutation) or absent in *B. ovis* are marked by a black lightning bolt. *B. abortus* genes that are synthetic lethal with *eipA* are: *bab1\_0055* (*pgm*: phosphoglucomutase), *bab1\_0534* (*wbkD*: epimerase/dehydratase), and *bab1\_0535* (*wbkF*: undecaprenyl-glycosyltransferase), *bab1\_0542* (*wzt/rfbE*: ATP-binding protein, O-antigen export), *bab1\_0543* (*wzm/rfbD*: permease, O-antigen export), *bab1\_0544* (*per*: perosamine synthetase), *bab1\_0545* (*gmd*: GDP-mannose 4,6 dehydratase), *bab1\_0553* (*wbkA*: glycosyltransferase), *bab1\_0563* (*wbkE*: glycosyltransferase), *bab1\_0639* (*wa\*\*/wadA*: glycosyltransferase), *bab1\_0999* (*wboA*: glycosyltransferase), *bab1\_1000* (*wboB*: glycosyltransferase), *bab1\_2092* (*bvrR*: response regulator), and *bab2\_0070* (*galU*: UTP-glucose-1-phosphate uridylyltransferase).

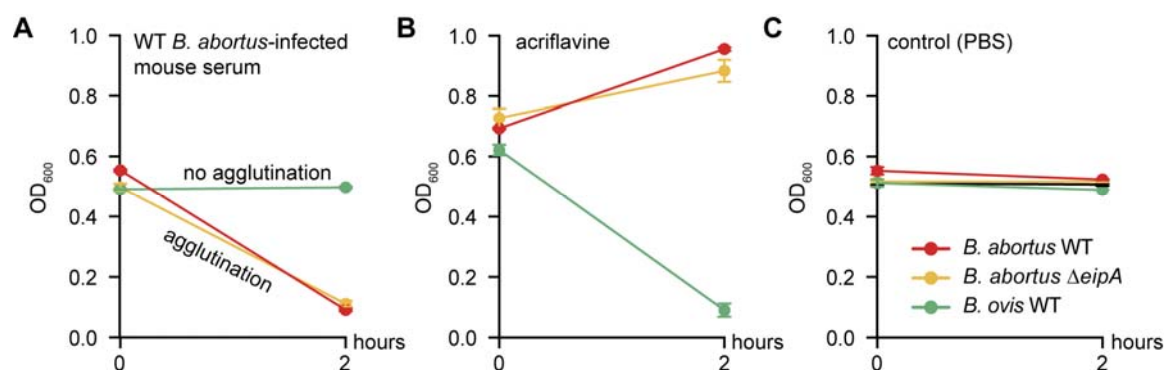

**Figure 7:** Deletion of *eipA* does not affect change the agglutination phenotype of *B. abortus*. Strains (wild-type *B. abortus* in red and  $\Delta eipA$  in yellow) and the wild-type *B. ovis* strain (in green) were incubated for 2 hours at room temperature in 1 ml of PBS supplemented with either (A) 20  $\mu$ l of serum from a *B. abortus*-infected mouse, (B) 5 mM acriflavine (final concentration), or (C) no treatment. OD<sub>600</sub> was measured at the beginning and the end of the experiment. Starting ODs used ~0.5. This experiment was performed in triplicate; each data point is the mean  $\pm$  the standard error of the mean.

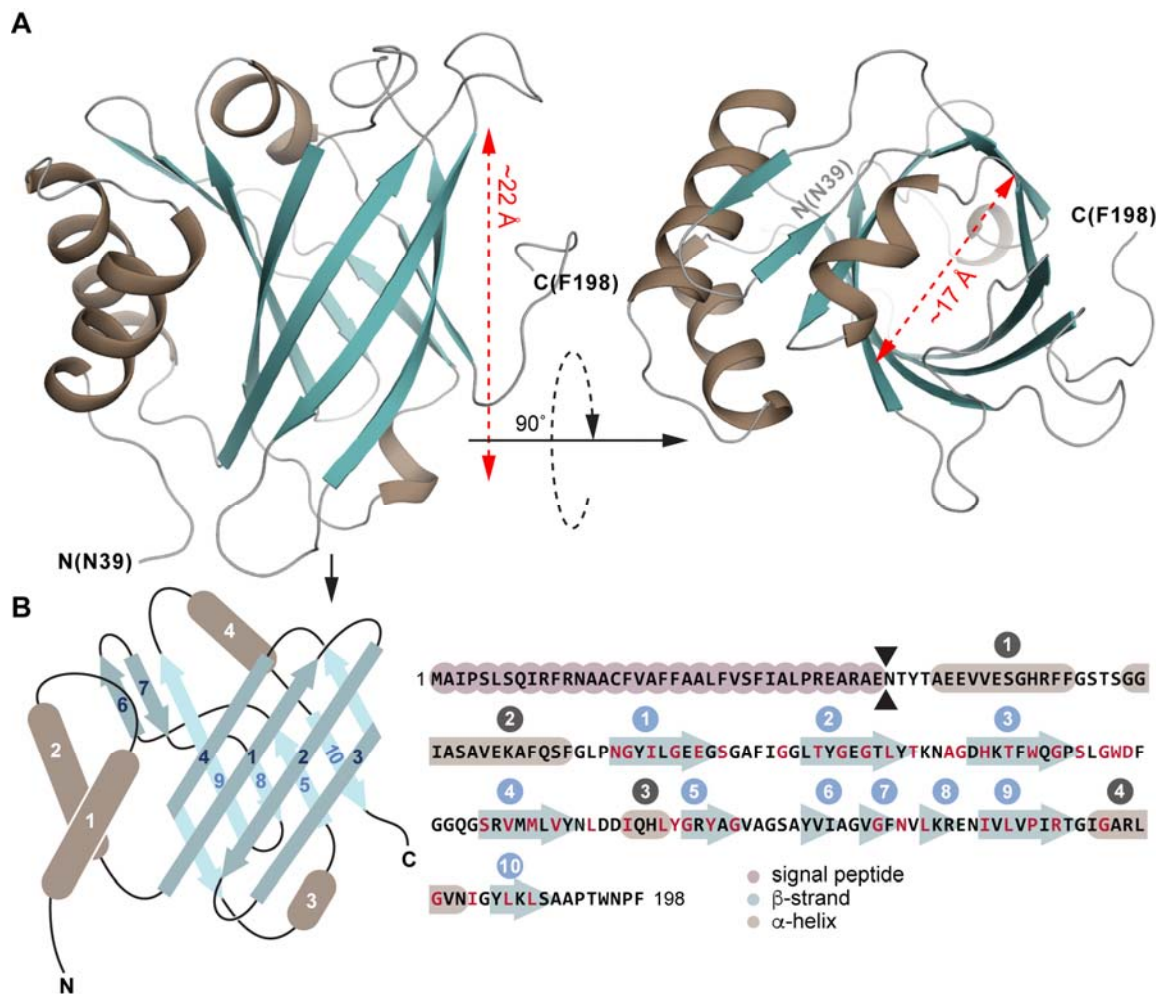

**Figure 8:** EipA adopts a compact  $\beta$ -barrel structure. A) Left: cartoon representation of the EipA X-ray crystal structure:  $\beta$ -strands in turquoise and  $\alpha$ -helices in brown. The N-terminus (residue N39) and the C-terminus (residue F198) are annotated. Right: a top view of EipA. Measurements of the  $\beta$ -barrel length and diameter are indicated in red. B) Left: simplified representation of EipA structure with the  $\beta$ -strands in turquoise and  $\alpha$ -helices in brown. Eight  $\beta$ -strands ( $\beta$ 1,  $\beta$ 2,  $\beta$ 3,  $\beta$ 4,  $\beta$ 5,  $\beta$ 8,  $\beta$ 9, and  $\beta$ 10) form a central  $\beta$ -barrel.  $\beta$ 6,  $\beta$ 7,  $\alpha$ 1,  $\alpha$ 2,  $\alpha$ 3, and  $\alpha$ 4 adopt an external position at the surface of the  $\beta$ -barrel. Right: amino acid sequence of EipA. The signal peptide sequence (M1-E38) is highlighted in pink.  $\beta$ -strands in turquoise and  $\alpha$ -helices in brown; secondary structures are numbered above the sequence. Residues with side chains oriented in the lumen of the protein are highlighted in red (85% of these residues are hydrophobic).

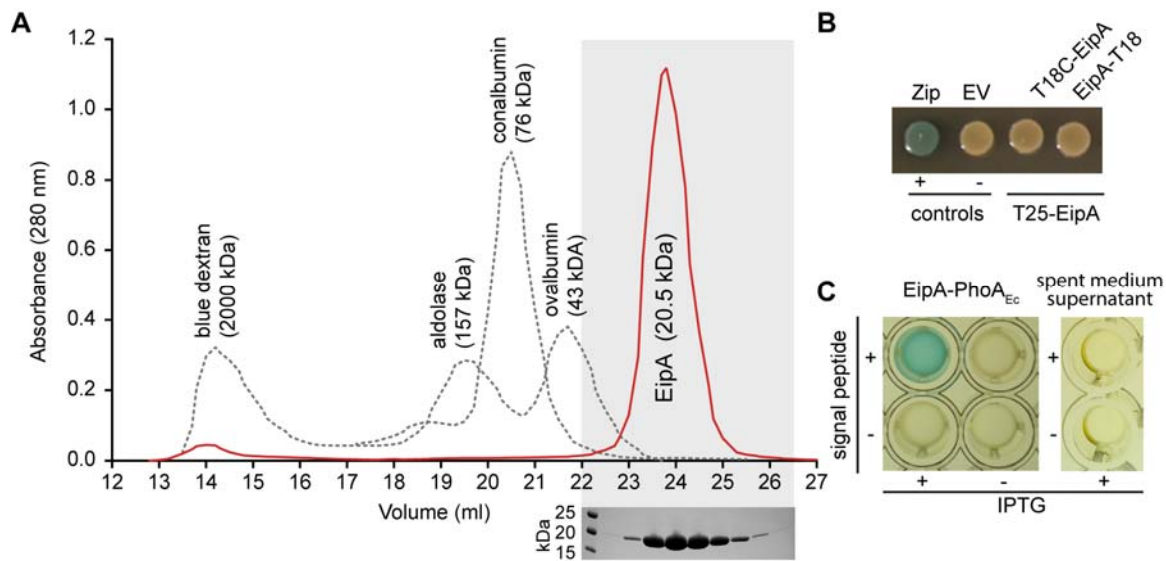

**Figure 9:** EipA is monomeric in solution and is secreted to the *Brucella* periplasm. A) Size exclusion chromatography elution profile of purified EipA (in red). Elution fractions were loaded on a SDS-PAGE gel, and a single band migrating at ~20 kDa was visible. Elution profile of the molecular weight standards (blue dextran: 2000 kDa, aldolase: 157 kDa, conalbumin: 76 kDa, ovalbumin: 43 kDa) are shown as a dashed grey line. This experiment was performed twice and yielded similar elution profiles. B) Bacterial two-hybrid assay. EipA fused to the T25 adenylate cyclase fragment was expressed in presence of EipA N- or C-terminally fused to the T18 adenylate cyclase fragment. Leucine-zipper (Zip) and empty vector (EV) strains were used as positive (blue color) and negative (beige/yellow color) controls, respectively. This experiment was performed at least three times with independent clones. A representative picture of a plate is presented. C) Alkaline phosphatase assay. Overnight cultures of *B. ovis* inducibly-expressing EipA with (+) or without (-) a signal peptide and fused to *E. coli* PhoA, were grown in presence (+) or absence (-) of 1 mM IPTG inducer. In a 96-well plate, these cultures were mixed with BCIP (200  $\mu$ M final concentration) and developed for 2 hours at 37°C / 5% CO<sub>2</sub>. Only the strain expressing EipA-PhoA<sub>EC</sub> with a signal peptide turned blue, providing evidence that the protein is located in the periplasm. As a control, spent medium supernatants were mixed with BCIP to test whether EipA-PhoA<sub>EC</sub> is secreted into the medium. After 2 hours incubation, no color change was observed, indicating that EipA-PhoA<sub>EC</sub> is not exported outside the cell. These experiments were performed at least three times with independent clones. A representative image is shown.



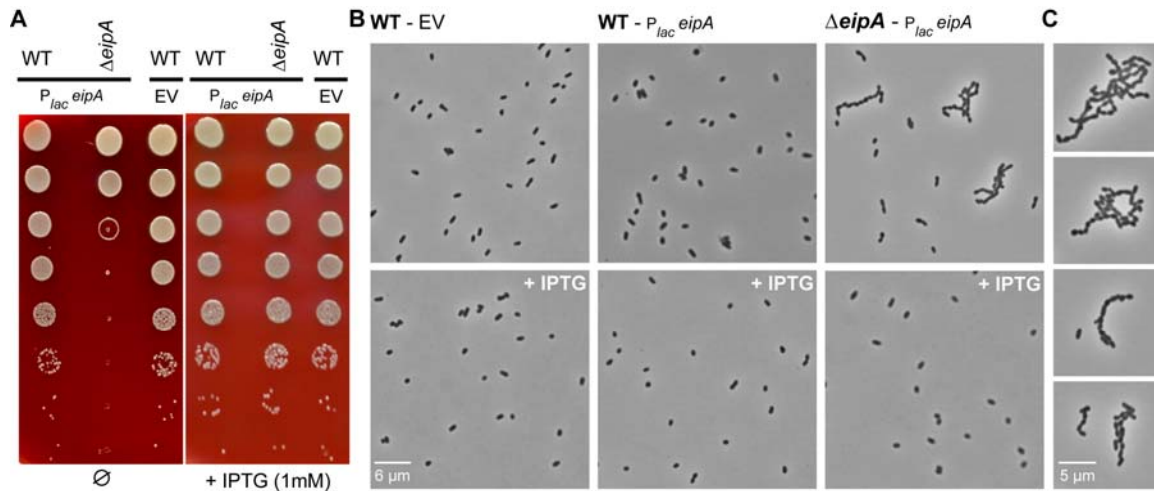

**Figure 10:** Depletion of *eipA* expression results in a growth defect and a cell chaining phenotype in *B. ovis*. A) Serial dilutions of overnight cultures were spotted on a SBA plates with (right) or without (left) 1 mM IPTG. *B. ovis* wild type or  $\Delta eipA$  strains carried a plasmid ( $P_{lac} eipA$ ) for IPTG-inducible expression of EipA. Wild-type *B. ovis* carrying empty vector (EV) control is also shown. IPTG-dependent expression of EipA (right) restores the growth defect observed in the  $\Delta eipA / P_{lac} eipA$  depletion strain grown without IPTG (left). This experiment was independently performed three times with two different clones each time; a representative picture is presented. B) Light micrographs of wild-type *B. ovis* empty vector control strain (left), wild-type/ $P_{lac} eipA$  (middle), and  $\Delta eipA/P_{lac} eipA$  (right) strains on SBA plates with (bottom) or without (top) 1 mM IPTG. Experiment was performed in triplicate with two independent clones each time; representative pictures are presented for each strain and condition. C) Micrographs highlighting the *B. ovis* cell division/chaining phenotype that is observed upon *eipA* depletion when cells are cultivated on solid media (condition in top right of panel B).



# Supplementary figures and tables

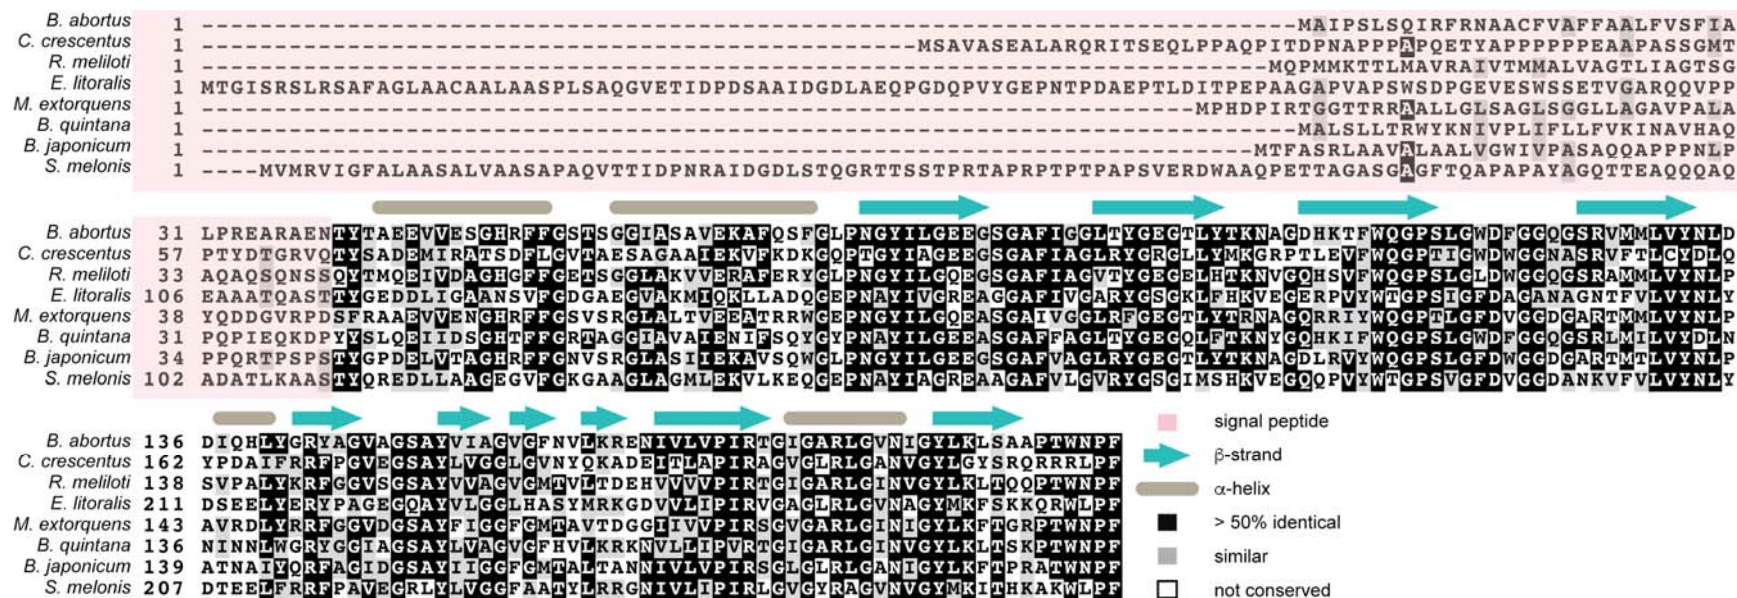

**Figure S1:** Amino acid sequence alignment of EipA (DUF1134) proteins of diverse Alphaproteobacteria: *B. abortus* (Bab1\_1612), *C. crescentus* (CC\_1035), *R. meliloti* (Smc00651), *Erythrobacter litoralis* (Eli\_00125), *Methylobacterium extorquens* (MexAM1\_META1p1722), *Bartonella quintana* (BQ09480), *Bradyrhizobium japonicum* (RN69\_37190), and *Sphingomonas melonis* (BJP26\_12640). Sequences corresponding to the peptide signal are delimited by a light-red rectangle. *B. abortus* EipA secondary structure is reported above the sequence alignment. β-strands are in turquoise and α-helices are in light brown.

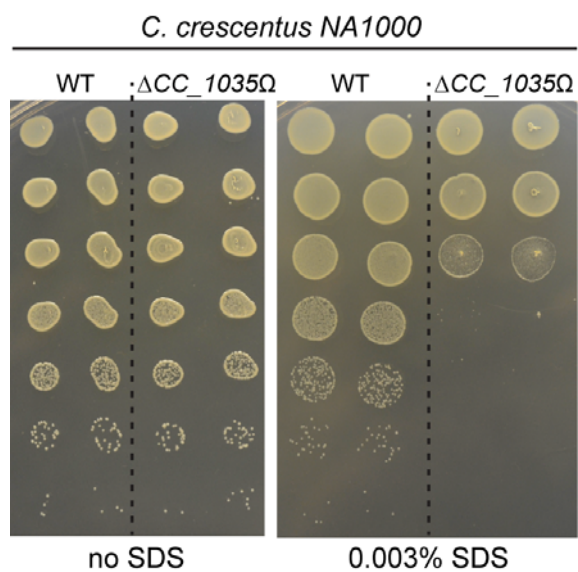

**Figure S2:** Stress survival plates. Ten-fold serial dilutions of log phase cultures of *C. crescentus* NA1000 strains (wild type or  $\Delta CC_{1035\Omega}$ ) were spotted on plain PYE agar plates or PYE plates containing 0.003% SDS and incubated for 3 days at 30°C.



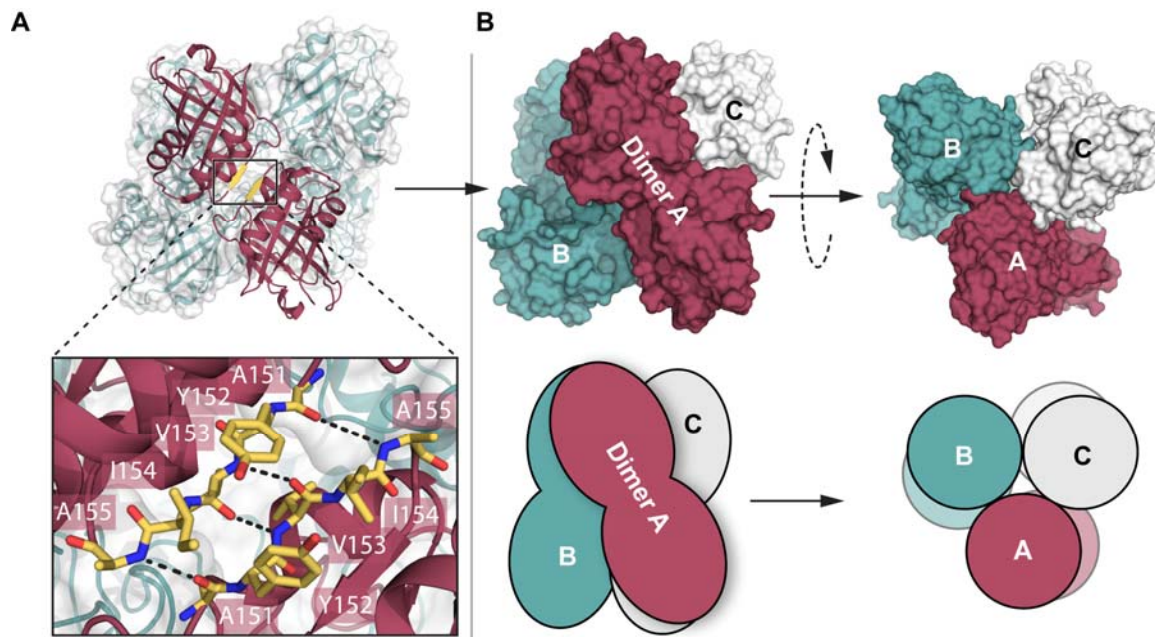

**Figure S3:** EipA interactions in the protein crystal. A) Two EipA molecules are present in the asymmetric unit of the crystal. These two proteins interact through hydrogen bonds between the  $\beta$ -strand 6 (in yellow) of each monomer (in maroon). Residues involved in this interaction are annotated in the inset. B) Two other dimers (in white and turquoise), present in the adjacent asymmetric units, could associate with the EipA dimer (in maroon) to form a hexameric complex of three dimers. Surface (top) and cartoon (bottom) representations of the crystal hexamer are presented. We note that at high concentrations in solution, EipA appears to be a monomer (see Figure 9).

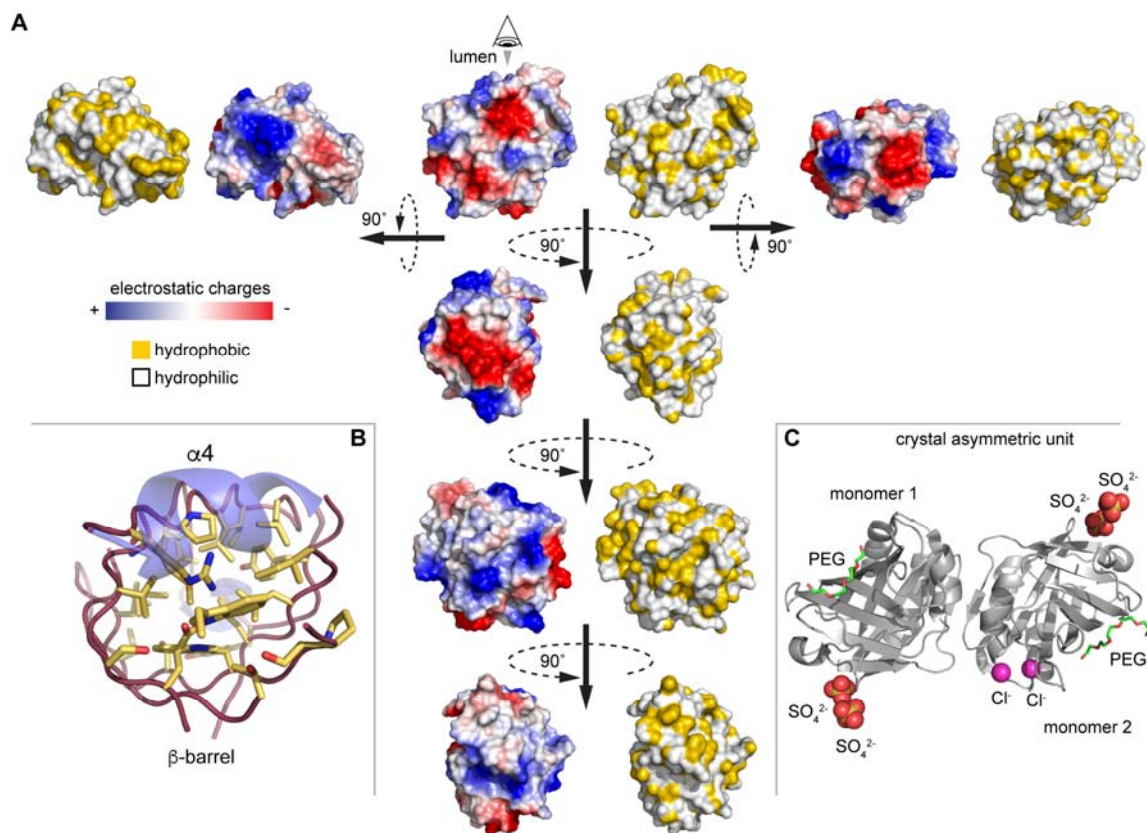

**Figure S4:** Electrostatic and hydrophobic characteristics of EipA surface. A) Different angle views of a surface representation of EipA. Electrostatic potentials are mapped in blue for positive charges and in red for negative charges. Hydrophobicity is represented in yellow. B) Inside view of EipA  $\beta$ -barrel. Yellow sticks represent hydrophobic side chains of residues inside the  $\beta$ -barrel.  $\alpha$ -helices  $\alpha 3$  and  $\alpha 6$  are in transparent blue. C) In the crystal asymmetric unit, electron density for two EipA molecules is clear (in grey); in addition, we modeled 4 sulfate ions (in red and yellow), 2 chloride ions (in magenta), and 2 PEG molecules (in green).

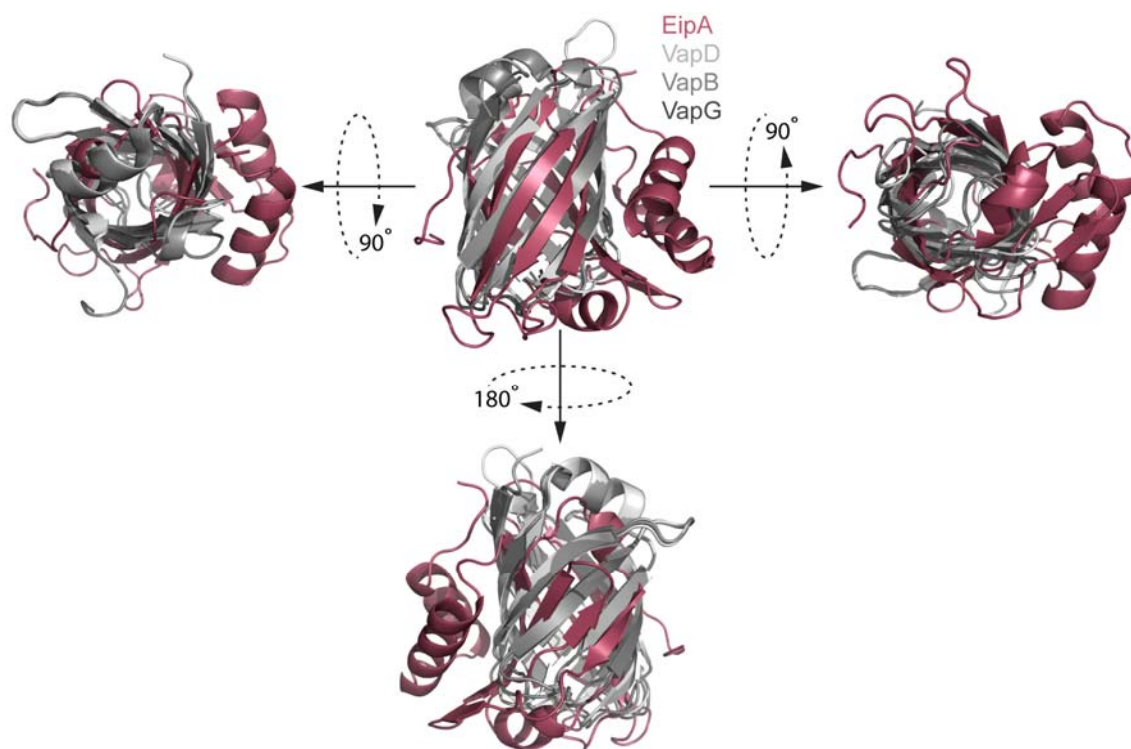

**Figure S5:** Different angle of views of a structural alignment between EipA (PDB: 5UC0, in maroon), and *R. equi* VapD (PDB: 4CSB, light grey), VapB (PDB: 4CV7, grey) and VapG (PDB: 5AEO, dark grey).

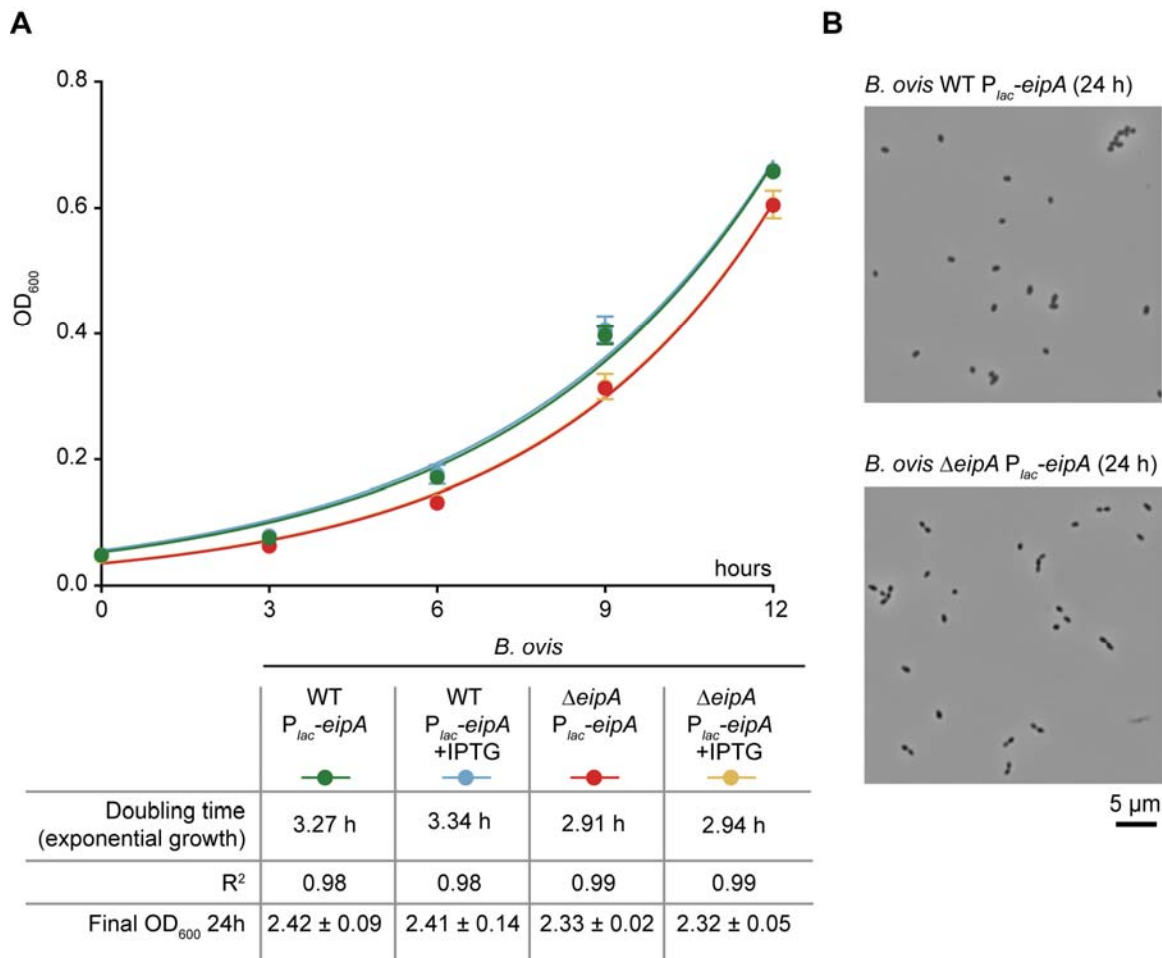

**Figure S6:** Growth and morphology of the *B. ovis eipA* depletion strain in liquid. A) 12-hour liquid growth profiles of *B. ovis* wild-type and  $\Delta eipA$  strains. Wild-type *B. ovis* carrying pSRK-*eipA* ( $P_{lac}\text{-}eipA$ ; IPTG-inducible) was grown in *Brucella* broth supplemented with (blue) or without (green) 1 mM IPTG. Similar conditions were tested with *B. ovis*  $\Delta eipA$  carrying  $P_{lac}\text{-}eipA$  (no IPTG: red, with IPTG: orange). The corresponding doubling times,  $R^2$  (coefficient of determination), and final ODs after 24 hours of cultivation are reported in the table below. B) Light micrographs of the corresponding strains after 24 hours of liquid growth without IPTG.



**Table S1:** Summary of histopathology scoring of spleens from *B. abortus*-infected mice. Scores range from 0 to 3, and are based on masked evaluation of sectioned and stained spleen tissue. The presence of *Brucella* in tissue was confirmed by immunohistochemistry. 0 = normal pathology (all naïve spleens scored 0 in all categories); 1 = mild pathology, 2 = moderate pathology, 3 = severe pathology relative to uninfected (naïve) control.

|                                             | Naive           | Wild-type                          | $\Delta eipA$                   | Complementation      |
|---------------------------------------------|-----------------|------------------------------------|---------------------------------|----------------------|
| <b>White pulp to red pulp ratio</b>         | Normal (1:1)    | Marked decrease, (2-3)             | No change, (0)                  | Marked decrease, (3) |
| <b>Average lymphoid follicles per field</b> | 12              | Decrease, (2)                      | No change, (0)                  | Decrease, (3)        |
| <b>Size of follicles</b>                    | Normal          | Decrease, (2)                      | Minimal change, (0-1)           | Decrease, (2)        |
| <b>Marginal zone depletion</b>              | Normal (intact) | Increase, (2)                      | Minimal to mild increase, (0-1) | Increase, (3)        |
| <b>Extramedullary hematopoiesis</b>         | Minimal         | Moderate to marked, (2-3)          | Moderate increase, (2)          | Marked increase, (3) |
| <b>Histiocytic proliferation</b>            | Absent          | Moderate to marked increase, (2-3) | Mild increase, (1)              | Marked increase, (3) |
| <b>Granulomas</b>                           | Absent          | Frequent, (2-3)                    | Rare, (1)                       | Frequent, (3)        |
| <b>Brucella immunoreactivities</b>          | Absent          | Frequent, (2-3)                    | Very rare, (0-1)                | Frequent, (3)        |

**Table S2** (see Excel file Table S2): List of the 1,920 growth conditions tested and the corresponding variation of absorbance ( $\Delta\text{Abs}_{630}$ ) between time=0 and 118 hours.

**Table S3:** Transposon library statistics

| Library                                    | Estimated number of Tn strains <sup>a</sup> | Unique Tn strain included <sup>b</sup> | Unique insertion sites <sup>c</sup> | Total TA sites <sup>d</sup> | Median Tn per gene | Median reads per gene |
|--------------------------------------------|---------------------------------------------|----------------------------------------|-------------------------------------|-----------------------------|--------------------|-----------------------|
| <i>B. abortus</i> 2308                     | $3.8 \times 10^6$                           | 535,231                                | 99,761                              | 156,924 (78,462)            | 86                 | 1436                  |
| <i>B. abortus</i> 2308 $\Delta\text{eipA}$ | $15.5 \times 10^6$                          | 716,817                                | 108,106                             | 156,924 (78,462)            | 119                | 5460                  |
| <i>B. ovis</i>                             | $2.6 \times 10^6$                           | 367,537                                | 95,026                              | 156,996 (78,498)            | 61                 | 1080                  |

<sup>a</sup> Chao2 estimate of number of barcodes present in the library

<sup>b</sup> Number of unique barcodes passing mapping criteria (sequenced 5 or more times, mapped to unique site, perfect match)

<sup>c</sup> Counts hits on opposite strands as unique

<sup>d</sup> TA sites on forward and reverse complement (TA on forward only)

**Table S4:** Crystallographic data collection and refinement statistics. Statistics for the highest resolution shell are shown in parentheses.

|                                    | EipA                                                                  |
|------------------------------------|-----------------------------------------------------------------------|
| Wavelength (Å)                     | 0.97929                                                               |
| Resolution range (Å)               | 32.64 - 1.73 (1.76 - 1.73)                                            |
| Space group                        | P6 <sub>3</sub>                                                       |
| Unit cell                          | a=b=113.08 Å, c=64.31 Å, $\alpha=\beta=90^\circ$ , $\gamma=120^\circ$ |
| # molecules in ASU                 | 2                                                                     |
| Unique reflections                 | 49076 (2420)                                                          |
| Multiplicity                       | 7.4 (7.3)                                                             |
| Completeness (%)                   | 99.7 (99.1)                                                           |
| Mean I/sigma(I)                    | 24.9 (2.2)                                                            |
| Wilson B-factor (Å <sup>2</sup> )  | 23.12                                                                 |
| R-merge                            | 0.089 (0.761)                                                         |
| cc1/2 (highest resolution shell)   | 0.799                                                                 |
| Reflections used for R-free        | 2539                                                                  |
| R-work                             | 0.176                                                                 |
| R-free                             | 0.208                                                                 |
| RMS(bonds)                         | 0.0100.007                                                            |
| RMS(angles)                        | 0.876                                                                 |
| Ramachandran favored (%)           | 97.8                                                                  |
| Ramachandran outliers (%)          | 0.0                                                                   |
| Clashscore                         | 8.97                                                                  |
| Average B-factor (Å <sup>2</sup> ) | 25.5                                                                  |

**Table S5:** A list of the top 50 most structurally similar proteins to EipA based on a Dali protein structure comparison. Proteins with a high Z-score, low rmsd, and high percentage of identity were considered to be structurally-related to the query protein structure. As expected, comparison of EipA to itself (Uncharacterized protein COG5400) is the top hit.

|    | PDB + Chain | Z-score | rmsd | Length of alignment | # residues | % identity | Description                                       |      |
|----|-------------|---------|------|---------------------|------------|------------|---------------------------------------------------|------|
| 1  | 5uc0-A      | 36.5    | 0    | 161                 | 161        | 100        | UNCHARACTERIZED PROTEIN COG5400                   | EipA |
| 2  | 5uc0-B      | 33.5    | 0.3  | 159                 | 159        | 100        | UNCHARACTERIZED PROTEIN COG5400                   | EipA |
| 3  | 4csb-A      | 7       | 3.1  | 95                  | 113        | 11         | VIRULENCE ASSOCIATED PROTEIN VAPD                 |      |
| 4  | 5aao-B      | 6.7     | 2.9  | 93                  | 110        | 13         | R. EQUI VAPG PROTEIN                              |      |
| 5  | 5aao-A      | 6.7     | 2.9  | 92                  | 110        | 11         | R. EQUI VAPG PROTEIN                              |      |
| 6  | 4cv7-A      | 6.4     | 2.9  | 91                  | 111        | 10         | VIRULENCE ASSOCIATED PROTEIN VAPB                 |      |
| 7  | 3ke6-A      | 4.1     | 3    | 77                  | 354        | 12         | PROTEIN RV1364C/MT1410                            |      |
| 8  | 2ovs-A      | 3.9     | 3    | 69                  | 118        | 13         | L0044                                             |      |
| 9  | 5l33-A      | 3.6     | 2.9  | 52                  | 106        | 8          | DENOVO NTF2                                       |      |
| 10 | 5tgn-A      | 3.5     | 3.2  | 54                  | 109        | 13         | UNCHARACTERIZED PROTEIN                           |      |
| 11 | 2b4w-A      | 3.5     | 2.8  | 65                  | 292        | 11         | HYPOTHETICAL PROTEIN, CONSERVED                   |      |
| 12 | 6f0x-P      | 3.5     | 3.3  | 82                  | 194        | 13         | PACHYTENE CHECKPOINT PROTEIN 2 HOMOLOG            |      |
| 13 | 3ke6-B      | 3.5     | 2.9  | 75                  | 348        | 12         | PROTEIN RV1364C/MT1410                            |      |
| 14 | 4odd-A      | 3.3     | 4    | 74                  | 149        | 3          | LIPOCALIN ALLERGEN                                |      |
| 15 | 4z6j-A      | 3.3     | 3.6  | 75                  | 133        | 7          | AVIDIN FAMILY                                     |      |
| 16 | 3cnx-C      | 3.2     | 3.2  | 58                  | 148        | 3          | UNCHARACTERIZED PROTEIN                           |      |
| 17 | 6dbn-A      | 3.2     | 2.8  | 51                  | 281        | 8          | TYROSINE-PROTEIN KINASE JAK1                      |      |
| 18 | 3d2u-E      | 3.2     | 5.5  | 60                  | 279        | 2          | UL18 PROTEIN                                      |      |
| 19 | 6f92-A      | 3       | 4.2  | 77                  | 760        | 6          | PUTATIVE ALPHA-1,2-MANNOSIDASE                    |      |
| 20 | 5oqj-H      | 3       | 2.9  | 68                  | 136        | 4          | DNA-DIRECTED RNA POLYMERASE II SUBUNIT RPB1       |      |
| 21 | 4rul-A      | 3       | 3    | 70                  | 821        | 16         | DNA TOPOISOMERASE 1                               |      |
| 22 | 4cgy-A      | 3       | 3.2  | 70                  | 619        | 6          | DNA TOPOISOMERASE 3-ALPHA                         |      |
| 23 | 2waq-G      | 3       | 3.5  | 68                  | 113        | 7          | DNA-DIRECTED RNA POLYMERASE RPO1N SUBUNIT         |      |
| 24 | 4rki-A      | 3       | 4.2  | 59                  | 374        | 7          | DNA POLYMERASE III SUBUNIT BETA                   |      |
| 25 | 2jso-A      | 2.9     | 3    | 63                  | 88         | 10         | POLYMYXIN RESISTANCE PROTEIN PMRD                 |      |
| 26 | 5hmv-A      | 2.9     | 2.7  | 51                  | 283        | 8          | PPKA N TERMINAL                                   |      |
| 27 | 5wce-A      | 2.9     | 3.7  | 58                  | 370        | 9          | DNA POLYMERASE III SUBUNIT BETA                   |      |
| 28 | 4ge1-A      | 2.9     | 3.6  | 79                  | 195        | 4          | BIOGENIC AMINE-BINDING PROTEIN                    |      |
| 29 | 4rlc-A      | 2.9     | 4    | 76                  | 135        | 8          | OUTER MEMBRANE PORIN F                            |      |
| 30 | 5iuq-A      | 2.9     | 4.7  | 49                  | 138        | 8          | GALECTIN-3                                        |      |
| 31 | 6d47-A      | 2.8     | 3.8  | 59                  | 388        | 5          | BETA SLIDING CLAMP                                |      |
| 32 | 2y32-C      | 2.8     | 3    | 67                  | 138        | 6          | BLR5658 PROTEIN                                   |      |
| 33 | 1yem-B      | 2.8     | 3.9  | 67                  | 166        | 3          | CONSERVED HYPOTHETICAL PROTEIN PFU-838710-001     |      |
| 34 | 5i8u-C      | 2.8     | 3.8  | 46                  | 203        | 9          | ADP-RIBOSE PYROPHOSPHATASE                        |      |
| 35 | 6deg-B      | 2.8     | 3.8  | 56                  | 351        | 2          | BETA SLIDING CLAMP                                |      |
| 36 | 1wzn-A      | 2.8     | 5.1  | 55                  | 245        | 5          | SAM-DEPENDENT METHYLTRANSFERASE                   |      |
| 37 | 3en8-A      | 2.8     | 3.2  | 53                  | 128        | 9          | UNCHARACTERIZED NTF-2 LIKE PROTEIN                |      |
| 38 | 4ysm-A      | 2.7     | 2.6  | 48                  | 475        | 10         | CALMODULIN-LIKE DOMAIN PROTEIN KINASE             |      |
| 39 | 2dsb-A      | 2.7     | 3.1  | 46                  | 206        | 13         | ADP-SUGAR PYROPHOSPHATASE                         |      |
| 40 | 5izl-A      | 2.7     | 4.6  | 58                  | 514        | 10         | SELENOCYSTEINE-SPECIFIC ELONGATION FACTOR         |      |
| 41 | 4dk0-A      | 2.7     | 3.2  | 55                  | 324        | 5          | PUTATIVE MACA                                     |      |
| 42 | 6fu5-B      | 2.7     | 3.6  | 49                  | 286        | 8          | RECEPTOR-INTERACTING SER/THR-PROTEIN KIN          |      |
| 43 | 4xrw-A      | 2.7     | 3.2  | 56                  | 305        | 9          | BEXL                                              |      |
| 44 | 1z47-A      | 2.7     | 4.6  | 51                  | 345        | 4          | PUTATIVE ABC-TRANSPORTER ATP-BINDING PROTEIN      |      |
| 45 | 4ci8-A      | 2.7     | 3.6  | 58                  | 640        | 7          | ECHINODERM MICROTUBULE-ASSOCIATED PROTEIN-LIKE    |      |
| 46 | 3f40-A      | 2.7     | 2.6  | 51                  | 112        | 6          | UNCHARACTERIZED NTF2-LIKE PROTEIN                 |      |
| 47 | 1mm4-A      | 2.7     | 3.1  | 70                  | 170        | 11         | CRCA PROTEIN                                      |      |
| 48 | 6es1-A      | 2.7     | 6.9  | 64                  | 420        | 5          | BOTULINUM NEUROTOXIN TYPE A                       |      |
| 49 | 5czo-A      | 2.7     | 3.2  | 50                  | 374        | 10         | CASEIN KINASE I HOMOLOG HRR25                     |      |
| 50 | 3cm1-A      | 2.7     | 3.5  | 75                  | 137        | 4          | SSGA-LIKE SPORULATION-SPECIFIC CELL DIVISION PROT |      |

**Table S6** (see Excel file Table S6): Primers used in this study.

**Table S7** (see Excel file Table S7): Strains used in this study.
